# Supplementary material
Source: Research Square preprint supplement (doi:10.21203/rs.3.rs-9836465/v1)
Supplement: Supplementary file 1 [file 32bd22c502aa17004eb197bd.xlsx]

## Sheet: Feuil1
ID isolation	Starting material	Number of mosquitoes	DNase treatment Specificity	DNA extraction specificity	sequencing technology
Isolation 1	Whole females	3000	1X DNase time kinetic	QIAamp MiniElute virus spin kit	illumina
			Lambda phage		short reads
Isolation 2	Whole females	7000	Overnight DNase concentration gradient kinetic	QIAamp MiniElute virus spin kit	/
			(1X to 10X)
Isolation 3	Whole females	3000	10X DNase concentration + overnight	phenol-chloroform method (Brunner et al., 2026)	nanopore long reads
	and	for each
	whole males
