# Supplementary material
Source: Research Square preprint supplement (doi:10.21203/rs.3.rs-9836465/v1)
Supplement: Supplementary file 1 [file 42cc480c20998b298a4ae62e.docx]

**Supplementary Information for “Phage WO packages cytoplasmic incompatibility genes in *Wolbachia”***

**Supplementary Notes**

**Supplementary Note 1: Reproducibility of phage isolations**

To evaluate the reproducibility of WO phage isolation and to assess whether encapsidated phage particles could be consistently recovered, two additional large-scale isolations were performed using approximately 7,000 and 3,000 mosquitoes, respectively. Quantitative PCR analyses indicated that these additional isolations did not result in any substantial enrichment of WO phage DNA (*gpw*) relative to *Wolbachia* (*wsp*) **Supplementary Fig. 1A**, panels 1 and 2). In both cases, *gpw* signals remained low and comparable to background levels, suggesting that large-scale extractions do not systematically yield high quantities of encapsidated WO phage DNA. These results indicate that, despite large input material, high levels of WO phage DNA are not systematically recovered across independent isolations.

**Supplementary Note 2: WO phage induction assays (chemical and thermal stress conditions)**

To assess whether WO phage production could be induced under conditions classically used for temperate phages, we performed independent induction assayscommonly employed for temperate phages including WO1 and known to trigger the bacterial SOS response, a pathway associated with prophage induction in diverse bacterial systems2–4.

For chemical induction, we collected first-instar larvae (L1) of the SLAB strain 24h after hatching and individually incubated for four days in 5mL of water supplemented with mitomycin C (MMC) at a final concentration of 5ng.mL-1. Control larvae were incubated under identical conditions in the absence of MMC. After four days of exposure, larvae were collected and processed for DNA extraction using the DNeasy Blood and Tissue Kit (Qiagen, Hilden, Germany), following the manufacturer’s protocol for quantification.

For thermal induction, we exposed adult SLAB females to elevated temperature conditions by incubation at 37°C for 1h. At the end of the exposure, individuals displayed a sub-lethal physiological state, characterized by impaired flight ability without mortality. Control females were maintained at 27°C under identical handling conditions.

For both induction assays, we quantified WO phage and *Wolbachia* abundance by qPCR targeting the *gpw* and *wsp* genes, respectively, as described above. qPCR-derived values were normalized to the mosquito *ace2* gene. Statistical comparisons between treated and control groups were performed using non-parametric Wilcoxon rank-sum tests, as detailed in **Supplementary Notebook 1**.

Thermal induction performed on adult SLAB females exposed to 37 °C for 1 h did not result in a significant increase in WO phage DNA relative to control females maintained at 27 °C, as measured by *gpw/ace2* ratios (**Supplementary** **Fig. 1B**, panel 1). Similarly, mitomycin C treatment of first-instar larvae (L1) at 5 ng ml⁻¹ over a four-day period did not lead to an increase in WO phage DNA compared to untreated controls (**Supplementary** **Fig. 1B**, panel 2). Instead, mitomycin C exposure was associated with a reduction in *Wolbachia* abundance, which was paralleled by a corresponding decrease in WO phage DNA levels. Under the conditions tested, neither thermal nor chemical induction resulted in an increase in WO phage DNA consistent with the production of encapsidated phage particles.

**Supplementary Figures**

**Supplementary Figure 1**

**Supplementary Fig. 1:** Quantification of *Wolbachia* and phage WO across independent phage isolations and induction assays. **A**. Quantitative PCR (qPCR) analysis of mosquito host (*ace2*), *Wolbachia* (*wsp*), pWCP plasmid (GP11) and WO phage (*gpw*). DNA following two additional independent phage isolations (isolation 2, left **panel** and isolation 3, right **panel**). Absolute DNA concentrations obtained by qPCR were normalized to the total amount of extracted DNA for each sample, providing a relative measure of the contribution of each genetic compartment within the encapsidated DNA fraction. **B**. qPCR-based assessment of phage induction experiments, showing *Wolbachia* (*wsp*) and WO phage (*gpw*) DNA levels normalized to the mosquito *ace2* gene. Two induction conditions were tested: left **panel**, Thermal induction in adult females exposed to 37°C for 1h, and right **panel**, Mitomycin C treatment in first-instar larvae (L1) over a four-day exposure period.

**Supplementary Tables**

**Supplementary Table 1. qPCR quantification of mosquito (*ace2*), *Wolbachia* (*wsp*), plasmid pWCP (*GP11*) and phage WO (*gpW*) genes in the isolate sample.**

**Supplementary Table 2.** **Metapangenomic table** with: 1) isolate assembly gene annotation, 2) pangenome gene cluster intersections between isolate assembly and reference *Wolbachia* and WO genomes, 3) gene-level annotations and isolate read coverage for gene cluster intersections.

**Supplementary Table 3.** **Summary of phage particle isolation experiments with starting material, number of mosquitoes, DNAse treatment specificity, DNA extraction specificity and sequencing technology.**

**Supplementary Table 4. Target genes used in qPCR assays**, including gene names, primer names and sequences, the number of gene copies in the genome *w*PipPel, and references from which the primers were obtained.

**Supplementary Notebooks**

**Supplementary Notebook 1:** Quantitative analysis of WO phage induction assays.

**Supplementary Notebook 2:** Assembly of Isolate and *w*PipSLAB from short paired-end reads and related analyzes: taxonomical binning and read alignments.

**Supplementary Notebook 3:** Anvi’o pangenomic analyzes using pWCP, WO, *w*PipSLAB and *w*PipPel including addition of metagenomic data layers.

**Supplementary Notebook 4:** Coverage calculation at gene cluster-level for alignment of Isolate reads and SLAB reads on *w*PipSLAB.

**Supplementary Notebook 5:** Coverage visualization of alignment of Isolate reads on *w*PipPel and WO regions.

**Supplementary Notebook 6:** Coverage barplot for alignment of Isolate reads on *w*PipPel regions (WO phage, MLST) and pWCP plasmid.

**Supplementary Notebook 7:** Coverage visualization of alignment of Isolate reads on Isolate assembly.

**References**

1. Bordenstein, S. R. & Bordenstein, S. R. Temperature Affects the Tripartite Interactions between Bacteriophage WO, Wolbachia, and Cytoplasmic Incompatibility. *PLOS ONE* **6**, e29106 (2011).

2. Howard-Varona, C., Hargreaves, K. R., Abedon, S. T. & Sullivan, M. B. Lysogeny in nature: mechanisms, impact and ecology of temperate phages. *ISME J* **11**, 1511–1520 (2017).

3. Xu, R. *et al.* Mitomycin C-induced prophage activation for exploring the Lysogeny-lysis functional dynamics in situ. *Applied Soil Ecology* **215**, 106436 (2025).

4. Greenrod, S. T. E., Hector, T. E., Blazanin, M., Cazares, D. & King, K. C. Temperature as a Driver of Phage Ecology and Evolution. *Annual Review of Microbiology* **79**, 497–522 (2025).
