# Supplementary material
Source: Research Square preprint supplement (doi:10.21203/rs.3.rs-9836465/v1)
Supplement: Supplementary file 3 [file 5e2b8f44c5be1ca23ab9019c.xlsx]

## Sheet: Feuil1
			gene abundance
	replicat	dnase time	ace_2	wolpip/qubit	wo/qubit	gp11/qubit
F20-1	1	20	0	0.00151	2.21	0.0121
F20-2	2	20	0	0	3.01	0.0155
F20-3	3	20	0	0.00213	1.61	0.0105
F30-1	1	30	0	0	3.15	0.0098
F30-2	2	30	0	0	1.3	0
F30-3	3	30	0	0	3.85	0.0159
F40-1	1	40	0	0	2.69	0.0094
F40-2	2	40	0	0.00135	2.39	0.0143
F40-3	3	40	0	0.00295	2.15	0.0103
F60-1	1	60	0	0.00113	1.29	0.0032
F60-2	2	60	0	0	1.84	0
F60-3	3	60	0	0.00144	5.08	0.0175
