# Supplementary material
Source: Research Square preprint supplement (doi:10.21203/rs.3.rs-9836465/v1)
Supplement: Supplementary file 4 [file a1d43b4c52447a1d917cc648.xlsx]

## Sheet: Feuil1
Name	Sequence	Target	Copy number	Reference
			(in wPipPel)
ace2 (Acequantidir)	5-GCAGCACCAGTCCAAGG-3	acetyl-	Single copy	(Weill et al., 2000)
ace2 (Acequantirev)	5-CTTCACGGCCGTTCAAGTAG-3	cholinesterase		(Weill et al., 2000)
wsp (Wolpipdir)	5-AGAATTGACGGCATTGAATA-3	Wolbachia surface protein		﻿(Berticat et al., 2002)
wsp (Wolpiprev)	5-CGTCGTTTTTGTTTAGTTGTG-3		Single copy	﻿(Berticat et al., 2002)
gp11 (GP11F)	5-GCTCAACAAACTGACTGCAA-3			(Newly designed from Reveillaud and Bordenstein et al., 2019)
gp11 (GP11R)	5-TTGACCCGAGTTCAGTTGAA-3	pWCP plasmid gene	Single copy	(Newly designed from Reveillaud and Bordenstein et al., 2019)
gp14 (GP14F)	5-GACCTTCCTGACCTTCCAAA-3		Single copy	(Newly designed from Reveillaud and Bordenstein et al., 2019)
gp14 (GP14R)	5-CGTCCTTTTAAGCTGTGGTG-3	pWCP plasmid gene		(Newly designed from Reveillaud and Bordenstein et al., 2019)
gpW (GPWF)	5-TGCAAAGCGGAGAAAGAGTTG-3		Four copies	Newly designed
gpW (GPWR)	5‘-GCCTCATGCCTGCAACTTTT-3’	Head-tail joining gene		Newly designed
