# Supplementary material
Source: Research Square preprint supplement (doi:10.21203/rs.3.rs-9836465/v1)
Supplement: Supplementary file 5 [file fb55cc5ef5b2f79a15ff8656.xlsx]

## Sheet: Full GFF
GFF COLUMNS									ID	PROTEIN	ISOLATE COV / ISOLATE
c_000000000001	.	CDS	1	1911	.	-	.	ID=WOLBACHIA___0;Name=PF01653.23;db_xref=Pfam:PF01653.23;product=NAD-dependent DNA ligase adenylation domain	0	NAD-dependent DNA ligase adenylation domain	16.5965
c_000000000002	.	CDS	2	340	.	+	.	ID=WOLBACHIA___1	1		24.531
c_000000000002	.	CDS	436	1434	.	-	.	ID=WOLBACHIA___2;Name=PF01381.28;db_xref=Pfam:PF01381.28;product=Helix-turn-helix	2	Helix-turn-helix	32.1802
c_000000000002	.	CDS	1470	2378	.	-	.	ID=WOLBACHIA___3;Name=PF01381.28;db_xref=Pfam:PF01381.28;product=Helix-turn-helix	3	Helix-turn-helix	24.0198
c_000000000003	.	CDS	1	75	.	+	.	ID=WOLBACHIA___4	4		13.0267
c_000000000003	.	CDS	110	2098	.	+	.	ID=WOLBACHIA___5;Name=PF12796.13;db_xref=Pfam:PF12796.13;product=Ankyrin repeats (3 copies)	5	Ankyrin repeats (3 copies)	46.4072
c_000000000004	.	CDS	210	1130	.	-	.	ID=WOLBACHIA___6;Name=PF01381.28;db_xref=Pfam:PF01381.28;product=Helix-turn-helix	6	Helix-turn-helix	63.4148
c_000000000004	.	CDS	1198	3069	.	-	.	ID=WOLBACHIA___7;Name=PF01119.25;db_xref=Pfam:PF01119.25;product=DNA mismatch repair protein C-terminal domain	7	DNA mismatch repair protein C-terminal domain	48.9316
c_000000000004	.	CDS	3060	3617	.	-	.	ID=WOLBACHIA___8;Name=PF00075.30;db_xref=Pfam:PF00075.30;product=RNase H	8	RNase H	59.3172
c_000000000004	.	CDS	4010	4918	.	+	.	ID=WOLBACHIA___9;Name=PF12784.13;db_xref=Pfam:PF12784.13;product=PD-(D/E)XK nuclease family transposase	9	PD-(D/E)XK nuclease family transposase	58.1573
c_000000000004	.	CDS	4990	6348	.	+	.	ID=WOLBACHIA___10	10		48.535
c_000000000005	.	CDS	334	2673	.	+	.	ID=WOLBACHIA___11	11		28.2778
c_000000000006	.	CDS	113	874	.	+	.	ID=WOLBACHIA___12;Name=PF14706.11;db_xref=Pfam:PF14706.11;product=Transposase DNA-binding	12	Transposase DNA-binding	41.9751
c_000000000006	.	CDS	815	1795	.	-	.	ID=WOLBACHIA___13;Name=PF00872.24;db_xref=Pfam:PF00872.24;product=Transposase Mutator family	13	Transposase Mutator family	115.664
c_000000000006	.	CDS	1805	2053	.	-	.	ID=WOLBACHIA___14	14		132.446
c_000000000006	.	CDS	2077	4143	.	-	.	ID=WOLBACHIA___15	15		52.1529
c_000000000007	.	CDS	3	1328	.	+	.	ID=WOLBACHIA___16	16		28.0415
c_000000000007	.	CDS	1388	1855	.	+	.	ID=WOLBACHIA___17	17		27.3718
c_000000000007	.	CDS	2059	3006	.	+	.	ID=WOLBACHIA___18;Name=PF01548.23;db_xref=Pfam:PF01548.23;product=Transposase	18	Transposase	55.904
c_000000000007	.	CDS	3237	4103	.	+	.	ID=WOLBACHIA___19	19		24.6747
c_000000000008	.	CDS	3	650	.	+	.	ID=WOLBACHIA___20	20		31.0972
c_000000000008	.	CDS	704	3286	.	+	.	ID=WOLBACHIA___21	21		62.3415
c_000000000009	.	CDS	1	546	.	+	.	ID=WOLBACHIA___22;Name=PF04865.19;db_xref=Pfam:PF04865.19;product=Baseplate J-like protein	22	Baseplate J-like protein	207.467
c_000000000009	.	CDS	810	1976	.	+	.	ID=WOLBACHIA___23;Name=PF09684.15;db_xref=Pfam:PF09684.15;product=Phage tail protein (Tail_P2_I)	23	Phage tail protein (Tail_P2_I)	261.004
c_000000000009	.	CDS	2144	2854	.	+	.	ID=WOLBACHIA___24;Name=PF00023.36;db_xref=Pfam:PF00023.36;product=Ankyrin repeat	24	Ankyrin repeat	237.71
c_000000000009	.	CDS	2880	3329	.	+	.	ID=WOLBACHIA___25;Name=PF00023.36;db_xref=Pfam:PF00023.36;product=Ankyrin repeat	25	Ankyrin repeat	255.807
c_000000000009	.	CDS	3334	3765	.	+	.	ID=WOLBACHIA___26;Name=PF11149.13;db_xref=Pfam:PF11149.13;product=Protein of unknown function (DUF2924)	26	Protein of unknown function (DUF2924)	279.44
c_000000000009	.	CDS	3775	5262	.	+	.	ID=WOLBACHIA___27;Name=PF00239.26;db_xref=Pfam:PF00239.26;product=Resolvase N terminal domain	27	Resolvase N terminal domain	221.067
c_000000000009	.	CDS	5586	8342	.	-	.	ID=WOLBACHIA___28;Name=PF12796.13;db_xref=Pfam:PF12796.13;product=Ankyrin repeats (3 copies)	28	Ankyrin repeats (3 copies)	104.467
c_000000000009	.	CDS	8552	9565	.	-	.	ID=WOLBACHIA___29;Name=PF06271.18;db_xref=Pfam:PF06271.18;product=RDD family	29	RDD family	110.484
c_000000000009	.	CDS	10233	16760	.	+	.	ID=WOLBACHIA___30;Name=PF13424.12;db_xref=Pfam:PF13424.12;product=Tetratricopeptide repeat	30	Tetratricopeptide repeat	69.9352
c_000000000010	.	CDS	3	896	.	-	.	ID=WOLBACHIA___31;Name=PF05136.18;db_xref=Pfam:PF05136.18;product=Phage portal protein lambda family	31	Phage portal protein lambda family	202.518
c_000000000010	.	CDS	1065	2948	.	-	.	ID=WOLBACHIA___32	32		80.8508
c_000000000010	.	CDS	3082	3162	.	-	.	ID=WOLBACHIA___33	33		160.185
c_000000000011	.	CDS	2	154	.	+	.	ID=WOLBACHIA___34	34		323.288
c_000000000011	.	CDS	154	1212	.	+	.	ID=WOLBACHIA___35;Name=PF06250.17;db_xref=Pfam:PF06250.17;product=YhcG PDDEXK nuclease domain	35	YhcG PDDEXK nuclease domain	492.697
c_000000000011	.	CDS	1212	2624	.	+	.	ID=WOLBACHIA___36;Name=PF05136.18;db_xref=Pfam:PF05136.18;product=Phage portal protein lambda family	36	Phage portal protein lambda family	692.509
c_000000000011	.	CDS	2639	3676	.	+	.	ID=WOLBACHIA___37;Name=PF01343.23;db_xref=Pfam:PF01343.23;product=Peptidase family S49	37	Peptidase family S49	629.945
c_000000000011	.	CDS	3802	4173	.	+	.	ID=WOLBACHIA___38;Name=PF02924.19;db_xref=Pfam:PF02924.19;product=Bacteriophage lambda head decoration protein D	38	Bacteriophage lambda head decoration protein D	513.747
c_000000000011	.	CDS	4199	4282	.	+	.	ID=WOLBACHIA___39	39		191.131
c_000000000012	.	CDS	806	2224	.	+	.	ID=WOLBACHIA___40;Name=PF01637.24;db_xref=Pfam:PF01637.24;product=ATPase domain predominantly from Archaea	40	ATPase domain predominantly from Archaea	18.8591
c_000000000013	.	CDS	1	246	.	-	.	ID=WOLBACHIA___41;Name=PF13637.12;db_xref=Pfam:PF13637.12;product=Ankyrin repeats (many copies)	41	Ankyrin repeats (many copies)	30.8293
c_000000000013	.	CDS	258	1559	.	-	.	ID=WOLBACHIA___42;Name=PF00078.32;db_xref=Pfam:PF00078.32;product=Reverse transcriptase (RNA-dependent DNA polymerase)	42	Reverse transcriptase (RNA-dependent DNA polymerase)	48.0469
c_000000000013	.	CDS	1730	2056	.	-	.	ID=WOLBACHIA___43	43		45.9541
c_000000000014	.	CDS	3	2546	.	-	.	ID=WOLBACHIA___44	44		27.489
c_000000000015	.	CDS	1	150	.	+	.	ID=WOLBACHIA___45	45		30.2733
c_000000000015	.	CDS	313	1062	.	+	.	ID=WOLBACHIA___46	46		31.86
c_000000000015	.	CDS	1167	1445	.	+	.	ID=WOLBACHIA___47;Name=PF09684.15;db_xref=Pfam:PF09684.15;product=Phage tail protein (Tail_P2_I)	47	Phage tail protein (Tail_P2_I)	36.0323
c_000000000016	.	CDS	2	2947	.	-	.	ID=WOLBACHIA___48	48		85.7654
c_000000000017	.	CDS	2	1129	.	+	.	ID=WOLBACHIA___49;Name=PF00575.29;db_xref=Pfam:PF00575.29;product=S1 RNA binding domain	49	S1 RNA binding domain	9.92287
c_000000000018	.	CDS	1	150	.	-	.	ID=WOLBACHIA___50	50		271.18
c_000000000018	.	CDS	147	1619	.	-	.	ID=WOLBACHIA___51;Name=PF12796.13;db_xref=Pfam:PF12796.13;product=Ankyrin repeats (3 copies)	51	Ankyrin repeats (3 copies)	343.359
c_000000000018	.	CDS	1619	1942	.	-	.	ID=WOLBACHIA___52	52		322.355
c_000000000019	.	CDS	332	754	.	-	.	ID=WOLBACHIA___53;Name=PF13610.12;db_xref=Pfam:PF13610.12;product=DDE domain	53	DDE domain	80.2742
c_000000000019	.	CDS	1167	1577	.	-	.	ID=WOLBACHIA___54;Name=PF13358.12;db_xref=Pfam:PF13358.12;product=DDE superfamily endonuclease	54	DDE superfamily endonuclease	42.7397
c_000000000019	.	CDS	1651	2169	.	-	.	ID=WOLBACHIA___55;Name=PF13592.12;db_xref=Pfam:PF13592.12;product=Winged helix-turn helix	55	Winged helix-turn helix	47.4933
c_000000000020	.	CDS	2	505	.	+	.	ID=WOLBACHIA___56;Name=PF13408.12;db_xref=Pfam:PF13408.12;product=Recombinase zinc beta ribbon domain	56	Recombinase zinc beta ribbon domain	53.8016
c_000000000020	.	CDS	613	1851	.	-	.	ID=WOLBACHIA___57;Name=PF00872.24;db_xref=Pfam:PF00872.24;product=Transposase Mutator family	57	Transposase Mutator family	35.4649
c_000000000020	.	CDS	1908	2444	.	-	.	ID=WOLBACHIA___58;Name=PF00872.24;db_xref=Pfam:PF00872.24;product=Transposase Mutator family	58	Transposase Mutator family	84.013
c_000000000020	.	CDS	2416	3084	.	-	.	ID=WOLBACHIA___59;Name=PF00872.24;db_xref=Pfam:PF00872.24;product=Transposase Mutator family	59	Transposase Mutator family	61.2123
c_000000000020	.	CDS	3190	3495	.	+	.	ID=WOLBACHIA___60	60		46.9379
c_000000000020	.	CDS	3751	7818	.	-	.	ID=WOLBACHIA___61;Name=PF12796.13;db_xref=Pfam:PF12796.13;product=Ankyrin repeats (3 copies)	61	Ankyrin repeats (3 copies)	43.8031
c_000000000021	.	CDS	2	274	.	+	.	ID=WOLBACHIA___62;Name=PF03864.22;db_xref=Pfam:PF03864.22;product=Phage major capsid protein E	62	Phage major capsid protein E	371.967
c_000000000021	.	CDS	349	654	.	+	.	ID=WOLBACHIA___63;Name=PF05354.17;db_xref=Pfam:PF05354.17;product=Phage Head-Tail Attachment protein	63	Phage Head-Tail Attachment protein	555.131
c_000000000021	.	CDS	656	1147	.	+	.	ID=WOLBACHIA___64;Name=PF06763.17;db_xref=Pfam:PF06763.17;product=Prophage minor tail protein Z (GPZ)	64	Prophage minor tail protein Z (GPZ)	533.478
c_000000000021	.	CDS	1144	1620	.	+	.	ID=WOLBACHIA___65	65		516.516
c_000000000021	.	CDS	1607	2071	.	+	.	ID=WOLBACHIA___66;Name=PF04717.18;db_xref=Pfam:PF04717.18;product=Type VI secretion system/phage-baseplate injector OB domain	66	Type VI secretion system/phage-baseplate injector OB domain	547.852
c_000000000021	.	CDS	2071	2325	.	+	.	ID=WOLBACHIA___67;Name=PF05488.18;db_xref=Pfam:PF05488.18;product=PAAR motif	67	PAAR motif	555.024
c_000000000021	.	CDS	2309	2779	.	+	.	ID=WOLBACHIA___68;Name=PF17761.7;db_xref=Pfam:PF17761.7;product=DUF1016 N-terminal domain	68	DUF1016 N-terminal domain	548.675
c_000000000021	.	CDS	2828	3160	.	+	.	ID=WOLBACHIA___69;Name=PF13340.11;db_xref=Pfam:PF13340.11;product=Putative transposase of IS4/5 family (DUF4096)	69	Putative transposase of IS4/5 family (DUF4096)	523.393
c_000000000021	.	CDS	3264	3620	.	+	.	ID=WOLBACHIA___70;Name=PF01609.27;db_xref=Pfam:PF01609.27;product=Transposase DDE domain	70	Transposase DDE domain	528.171
c_000000000021	.	CDS	3716	5698	.	-	.	ID=WOLBACHIA___71;Name=PF12796.13;db_xref=Pfam:PF12796.13;product=Ankyrin repeats (3 copies)	71	Ankyrin repeats (3 copies)	537.808
c_000000000021	.	CDS	6615	17276	.	+	.	ID=WOLBACHIA___72;Name=PF12796.13;db_xref=Pfam:PF12796.13;product=Ankyrin repeats (3 copies)	72	Ankyrin repeats (3 copies)	67.5207
c_000000000022	.	CDS	2	643	.	+	.	ID=WOLBACHIA___73;Name=PF15658.11;db_xref=Pfam:PF15658.11;product=Latrotoxin C-terminal domain	73	Latrotoxin C-terminal domain	42.7757
c_000000000022	.	CDS	649	1560	.	-	.	ID=WOLBACHIA___74;Name=PF12784.13;db_xref=Pfam:PF12784.13;product=PD-(D/E)XK nuclease family transposase	74	PD-(D/E)XK nuclease family transposase	50.2785
c_000000000022	.	CDS	1689	2237	.	+	.	ID=WOLBACHIA___75;Name=PF13443.12;db_xref=Pfam:PF13443.12;product=Cro/C1-type HTH DNA-binding domain	75	Cro/C1-type HTH DNA-binding domain	35.2732
c_000000000022	.	CDS	2264	2614	.	+	.	ID=WOLBACHIA___76	76		33.3048
c_000000000023	.	CDS	2	154	.	+	.	ID=WOLBACHIA___77	77		426.301
c_000000000023	.	CDS	155	1573	.	+	.	ID=WOLBACHIA___78;Name=PF05136.18;db_xref=Pfam:PF05136.18;product=Phage portal protein lambda family	78	Phage portal protein lambda family	450.13
c_000000000023	.	CDS	1573	2238	.	+	.	ID=WOLBACHIA___79;Name=PF01343.23;db_xref=Pfam:PF01343.23;product=Peptidase family S49	79	Peptidase family S49	622.644
c_000000000024	.	CDS	1	150	.	-	.	ID=WOLBACHIA___80	80		540.54
c_000000000024	.	CDS	147	1610	.	-	.	ID=WOLBACHIA___81;Name=PF12796.13;db_xref=Pfam:PF12796.13;product=Ankyrin repeats (3 copies)	81	Ankyrin repeats (3 copies)	957.139
c_000000000024	.	CDS	1631	2116	.	-	.	ID=WOLBACHIA___82	82		1088.75
c_000000000024	.	CDS	2124	3344	.	-	.	ID=WOLBACHIA___83;Name=PF01555.25;db_xref=Pfam:PF01555.25;product=DNA methylase	83	DNA methylase	1410.21
c_000000000024	.	CDS	3454	3909	.	-	.	ID=WOLBACHIA___84	84		191.553
c_000000000024	.	CDS	4172	6304	.	+	.	ID=WOLBACHIA___85;Name=PF13481.12;db_xref=Pfam:PF13481.12;product=AAA domain	85	AAA domain	159.318
c_000000000024	.	CDS	6279	6689	.	-	.	ID=WOLBACHIA___86;Name=PF13586.12;db_xref=Pfam:PF13586.12;product=Transposase DDE domain	86	Transposase DDE domain	157.81
c_000000000024	.	CDS	6731	7111	.	-	.	ID=WOLBACHIA___87;Name=PF13340.11;db_xref=Pfam:PF13340.11;product=Putative transposase of IS4/5 family (DUF4096)	87	Putative transposase of IS4/5 family (DUF4096)	140.95
c_000000000024	.	CDS	8559	9083	.	+	.	ID=WOLBACHIA___88;Name=PF13518.12;db_xref=Pfam:PF13518.12;product=Helix-turn-helix domain	88	Helix-turn-helix domain	170.347
c_000000000024	.	CDS	9144	9968	.	+	.	ID=WOLBACHIA___89;Name=PF13479.12;db_xref=Pfam:PF13479.12;product=AAA domain	89	AAA domain	152.692
c_000000000024	.	CDS	9985	10791	.	+	.	ID=WOLBACHIA___90;Name=PF13481.12;db_xref=Pfam:PF13481.12;product=AAA domain	90	AAA domain	156.123
c_000000000024	.	CDS	10831	11331	.	+	.	ID=WOLBACHIA___91	91		151.383
c_000000000024	.	CDS	11374	13122	.	+	.	ID=WOLBACHIA___92;Name=PF13481.12;db_xref=Pfam:PF13481.12;product=AAA domain	92	AAA domain	159.337
c_000000000024	.	CDS	13129	14265	.	-	.	ID=WOLBACHIA___93	93		173.501
c_000000000024	.	CDS	14207	15418	.	-	.	ID=WOLBACHIA___94	94		172.77
c_000000000024	.	CDS	15559	16242	.	+	.	ID=WOLBACHIA___95;Name=PF25691.1;db_xref=Pfam:PF25691.1;product=Baseplate wedge 3 tail fiber network component	95	Baseplate wedge 3 tail fiber network component	156.887
c_000000000024	.	CDS	16249	18201	.	+	.	ID=WOLBACHIA___96;Name=PF16075.10;db_xref=Pfam:PF16075.10;product=Domain of unknown function (DUF4815)	96	Domain of unknown function (DUF4815)	157.807
c_000000000024	.	CDS	18213	19400	.	+	.	ID=WOLBACHIA___97	97		180.235
c_000000000024	.	CDS	19405	19608	.	+	.	ID=WOLBACHIA___98	98		198.26
c_000000000024	.	CDS	19595	21022	.	+	.	ID=WOLBACHIA___99	99		180.919
c_000000000024	.	CDS	21198	22376	.	+	.	ID=WOLBACHIA___100;Name=PF04984.19;db_xref=Pfam:PF04984.19;product=Phage tail sheath protein subtilisin-like domain	100	Phage tail sheath protein subtilisin-like domain	171.745
c_000000000024	.	CDS	22394	22900	.	+	.	ID=WOLBACHIA___101;Name=PF04985.20;db_xref=Pfam:PF04985.20;product=Phage tail tube protein FII	101	Phage tail tube protein FII	181.195
c_000000000024	.	CDS	22947	23204	.	+	.	ID=WOLBACHIA___102;Name=PF10109.15;db_xref=Pfam:PF10109.15;product=Phage tail assembly chaperone proteins E or 41 or 14	102	Phage tail assembly chaperone proteins E or 41 or 14	188.957
c_000000000024	.	CDS	23314	25563	.	+	.	ID=WOLBACHIA___103;Name=PF10145.14;db_xref=Pfam:PF10145.14;product=Phage-related minor tail protein	103	Phage-related minor tail protein	165.762
c_000000000024	.	CDS	25563	25919	.	+	.	ID=WOLBACHIA___104;Name=PF06995.16;db_xref=Pfam:PF06995.16;product=Phage P2 GpU	104	Phage P2 GpU	169.689
c_000000000024	.	CDS	25916	26125	.	+	.	ID=WOLBACHIA___105;Name=PF05489.18;db_xref=Pfam:PF05489.18;product=Phage Tail Protein X	105	Phage Tail Protein X	179.348
c_000000000024	.	CDS	26126	27061	.	+	.	ID=WOLBACHIA___106	106		184.416
c_000000000024	.	CDS	27118	27642	.	+	.	ID=WOLBACHIA___107;Name=PF12796.13;db_xref=Pfam:PF12796.13;product=Ankyrin repeats (3 copies)	107	Ankyrin repeats (3 copies)	132.657
c_000000000024	.	CDS	27781	28161	.	+	.	ID=WOLBACHIA___108;Name=PF01710.22;db_xref=Pfam:PF01710.22;product=Transposase	108	Transposase	95.9396
c_000000000024	.	CDS	28158	28640	.	+	.	ID=WOLBACHIA___109;Name=PF13358.12;db_xref=Pfam:PF13358.12;product=DDE superfamily endonuclease	109	DDE superfamily endonuclease	119.433
c_000000000024	.	CDS	28656	28859	.	+	.	ID=WOLBACHIA___110	110		146.191
c_000000000024	.	CDS	28860	29366	.	-	.	ID=WOLBACHIA___111;Name=PF13091.12;db_xref=Pfam:PF13091.12;product=PLD-like domain	111	PLD-like domain	109.247
c_000000000024	.	CDS	29372	30295	.	+	.	ID=WOLBACHIA___112;Name=PF01734.28;db_xref=Pfam:PF01734.28;product=Patatin-like phospholipase	112	Patatin-like phospholipase	122.508
c_000000000024	.	CDS	30376	31287	.	-	.	ID=WOLBACHIA___113;Name=PF01381.28;db_xref=Pfam:PF01381.28;product=Helix-turn-helix	113	Helix-turn-helix	135.28
c_000000000024	.	CDS	31313	32215	.	-	.	ID=WOLBACHIA___114;Name=PF01381.28;db_xref=Pfam:PF01381.28;product=Helix-turn-helix	114	Helix-turn-helix	110.751
c_000000000024	.	CDS	32316	33500	.	-	.	ID=WOLBACHIA___115	115		102.995
c_000000000024	.	CDS	33608	34057	.	-	.	ID=WOLBACHIA___116;Name=PF04002.20;db_xref=Pfam:PF04002.20;product=RadC-like JAB domain	116	RadC-like JAB domain	82.2867
c_000000000024	.	CDS	34050	34157	.	-	.	ID=WOLBACHIA___117	117		54.8056
c_000000000025	.	CDS	383	661	.	-	.	ID=WOLBACHIA___118	118		396.67
c_000000000025	.	CDS	898	1959	.	+	.	ID=WOLBACHIA___119;Name=PF02902.25;db_xref=Pfam:PF02902.25;product=Ulp1 protease family C-terminal catalytic domain	119	Ulp1 protease family C-terminal catalytic domain	439.778
c_000000000025	.	CDS	3093	3965	.	+	.	ID=WOLBACHIA___120;Name=PF13612.12;db_xref=Pfam:PF13612.12;product=Transposase DDE domain	120	Transposase DDE domain	684.076
c_000000000025	.	CDS	3962	4237	.	-	.	ID=WOLBACHIA___121	121		481.54
c_000000000025	.	CDS	4402	5319	.	-	.	ID=WOLBACHIA___122;Name=PF01381.28;db_xref=Pfam:PF01381.28;product=Helix-turn-helix	122	Helix-turn-helix	466.097
c_000000000025	.	CDS	5433	6326	.	+	.	ID=WOLBACHIA___123;Name=PF12784.13;db_xref=Pfam:PF12784.13;product=PD-(D/E)XK nuclease family transposase	123	PD-(D/E)XK nuclease family transposase	541.977
c_000000000025	.	CDS	6688	7248	.	-	.	ID=WOLBACHIA___124	124		474.683
c_000000000025	.	CDS	7394	7561	.	-	.	ID=WOLBACHIA___125	125		496.863
c_000000000025	.	CDS	7561	8352	.	-	.	ID=WOLBACHIA___126;Name=PF04865.19;db_xref=Pfam:PF04865.19;product=Baseplate J-like protein	126	Baseplate J-like protein	529.894
c_000000000025	.	CDS	8355	8690	.	-	.	ID=WOLBACHIA___127;Name=PF04965.19;db_xref=Pfam:PF04965.19;product=Baseplate wedge protein gp25	127	Baseplate wedge protein gp25	573.259
c_000000000025	.	CDS	8687	8947	.	-	.	ID=WOLBACHIA___128;Name=PF05488.18;db_xref=Pfam:PF05488.18;product=PAAR motif	128	PAAR motif	530.467
c_000000000025	.	CDS	8956	9420	.	-	.	ID=WOLBACHIA___129;Name=PF04717.18;db_xref=Pfam:PF04717.18;product=Type VI secretion system/phage-baseplate injector OB domain	129	Type VI secretion system/phage-baseplate injector OB domain	514.656
c_000000000025	.	CDS	9407	9883	.	-	.	ID=WOLBACHIA___130	130		545.658
c_000000000025	.	CDS	9880	10377	.	-	.	ID=WOLBACHIA___131;Name=PF06763.17;db_xref=Pfam:PF06763.17;product=Prophage minor tail protein Z (GPZ)	131	Prophage minor tail protein Z (GPZ)	549.92
c_000000000025	.	CDS	10379	10684	.	-	.	ID=WOLBACHIA___132;Name=PF05354.17;db_xref=Pfam:PF05354.17;product=Phage Head-Tail Attachment protein	132	Phage Head-Tail Attachment protein	477.958
c_000000000025	.	CDS	10782	11786	.	-	.	ID=WOLBACHIA___133;Name=PF03864.22;db_xref=Pfam:PF03864.22;product=Phage major capsid protein E	133	Phage major capsid protein E	714.775
c_000000000026	.	CDS	1	1827	.	+	.	ID=WOLBACHIA___134;Name=PF05876.18;db_xref=Pfam:PF05876.18;product=Phage terminase large subunit gpA ATPase domain	134	Phage terminase large subunit gpA ATPase domain	1130.7
c_000000000026	.	CDS	1817	2026	.	+	.	ID=WOLBACHIA___135	135		670.348
c_000000000027	.	CDS	2	496	.	+	.	ID=WOLBACHIA___136;Name=PF01343.23;db_xref=Pfam:PF01343.23;product=Peptidase family S49	136	Peptidase family S49	399.216
c_000000000027	.	CDS	642	1013	.	+	.	ID=WOLBACHIA___137;Name=PF02924.19;db_xref=Pfam:PF02924.19;product=Bacteriophage lambda head decoration protein D	137	Bacteriophage lambda head decoration protein D	465.629
c_000000000027	.	CDS	1039	1122	.	+	.	ID=WOLBACHIA___138	138		180.357
c_000000000028	.	CDS	2	514	.	+	.	ID=WOLBACHIA___139;Name=PF01343.23;db_xref=Pfam:PF01343.23;product=Peptidase family S49	139	Peptidase family S49	266.493
c_000000000028	.	CDS	589	957	.	+	.	ID=WOLBACHIA___140;Name=PF02924.19;db_xref=Pfam:PF02924.19;product=Bacteriophage lambda head decoration protein D	140	Bacteriophage lambda head decoration protein D	268.799
c_000000000028	.	CDS	1001	2005	.	+	.	ID=WOLBACHIA___141;Name=PF03864.22;db_xref=Pfam:PF03864.22;product=Phage major capsid protein E	141	Phage major capsid protein E	413.958
c_000000000028	.	CDS	2005	2325	.	+	.	ID=WOLBACHIA___142;Name=PF05354.17;db_xref=Pfam:PF05354.17;product=Phage Head-Tail Attachment protein	142	Phage Head-Tail Attachment protein	244.794
c_000000000028	.	CDS	2315	2812	.	+	.	ID=WOLBACHIA___143;Name=PF06763.17;db_xref=Pfam:PF06763.17;product=Prophage minor tail protein Z (GPZ)	143	Prophage minor tail protein Z (GPZ)	265.769
c_000000000028	.	CDS	2809	3282	.	+	.	ID=WOLBACHIA___144	144		281.072
c_000000000028	.	CDS	3269	3733	.	+	.	ID=WOLBACHIA___145;Name=PF04717.18;db_xref=Pfam:PF04717.18;product=Type VI secretion system/phage-baseplate injector OB domain	145	Type VI secretion system/phage-baseplate injector OB domain	269.68
c_000000000028	.	CDS	3730	3984	.	+	.	ID=WOLBACHIA___146;Name=PF05488.18;db_xref=Pfam:PF05488.18;product=PAAR motif	146	PAAR motif	261.333
c_000000000028	.	CDS	3987	4322	.	+	.	ID=WOLBACHIA___147;Name=PF04965.19;db_xref=Pfam:PF04965.19;product=Baseplate wedge protein gp25	147	Baseplate wedge protein gp25	226.786
c_000000000028	.	CDS	4325	4621	.	+	.	ID=WOLBACHIA___148	148		242.135
c_000000000029	.	CDS	153	1133	.	+	.	ID=WOLBACHIA___149;Name=PF13683.12;db_xref=Pfam:PF13683.12;product=Integrase core domain	149	Integrase core domain	36.6126
c_000000000029	.	CDS	1201	6801	.	-	.	ID=WOLBACHIA___150;Name=PF02338.25;db_xref=Pfam:PF02338.25;product=OTU-like cysteine protease	150	OTU-like cysteine protease	35.4576
c_000000000029	.	CDS	7771	9108	.	+	.	ID=WOLBACHIA___151	151		76.2265
c_000000000029	.	CDS	9116	11314	.	+	.	ID=WOLBACHIA___152;Name=PF08011.17;db_xref=Pfam:PF08011.17;product=PD-(D/E)XK nuclease superfamily	152	PD-(D/E)XK nuclease superfamily	87.2588
c_000000000029	.	CDS	11964	13910	.	+	.	ID=WOLBACHIA___153;Name=PF12796.13;db_xref=Pfam:PF12796.13;product=Ankyrin repeats (3 copies)	153	Ankyrin repeats (3 copies)	93.5927
c_000000000029	.	CDS	14377	14700	.	-	.	ID=WOLBACHIA___154	154		43.1512
c_000000000030	.	CDS	1	972	.	-	.	ID=WOLBACHIA___155;Name=PF01872.23;db_xref=Pfam:PF01872.23;product=RibD C-terminal domain	155	RibD C-terminal domain	14.3755
c_000000000031	.	CDS	208	2613	.	+	.	ID=WOLBACHIA___156;Name=PF20041.5;db_xref=Pfam:PF20041.5;product=Domain of unknown function (DUF6443)	156	Domain of unknown function (DUF6443)	27.4767
c_000000000032	.	CDS	2	4150	.	+	.	ID=WOLBACHIA___157;Name=PF05088.18;db_xref=Pfam:PF05088.18;product=Bacterial NAD-glutamate dehydrogenase catalytic domain	157	Bacterial NAD-glutamate dehydrogenase catalytic domain	29.5936
c_000000000032	.	CDS	4156	4446	.	+	.	ID=WOLBACHIA___158	158		27.9485
c_000000000032	.	CDS	4418	5794	.	+	.	ID=WOLBACHIA___159;Name=PF00072.30;db_xref=Pfam:PF00072.30;product=Response regulator receiver domain	159	Response regulator receiver domain	32.6129
c_000000000032	.	CDS	5817	6545	.	-	.	ID=WOLBACHIA___160;Name=PF02565.21;db_xref=Pfam:PF02565.21;product=Recombination protein O C terminal	160	Recombination protein O C terminal	32.0549
c_000000000032	.	CDS	6742	7290	.	+	.	ID=WOLBACHIA___161	161		38.3133
c_000000000032	.	CDS	7338	7667	.	+	.	ID=WOLBACHIA___162;Name=PF01797.21;db_xref=Pfam:PF01797.21;product=Transposase IS200 like	162	Transposase IS200 like	16.1333
c_000000000032	.	CDS	7866	8045	.	+	.	ID=WOLBACHIA___163	163		7.11667
c_000000000033	.	CDS	60	1004	.	+	.	ID=WOLBACHIA___164;Name=PF09684.15;db_xref=Pfam:PF09684.15;product=Phage tail protein (Tail_P2_I)	164	Phage tail protein (Tail_P2_I)	37.8307
c_000000000034	.	CDS	3	917	.	+	.	ID=WOLBACHIA___165;Name=PF01381.28;db_xref=Pfam:PF01381.28;product=Helix-turn-helix	165	Helix-turn-helix	48.6798
c_000000000034	.	CDS	1081	1749	.	+	.	ID=WOLBACHIA___166;Name=PF04002.20;db_xref=Pfam:PF04002.20;product=RadC-like JAB domain	166	RadC-like JAB domain	55.2422
c_000000000034	.	CDS	2048	3280	.	+	.	ID=WOLBACHIA___167	167		52.0089
c_000000000034	.	CDS	3344	4321	.	+	.	ID=WOLBACHIA___168;Name=PF01381.28;db_xref=Pfam:PF01381.28;product=Helix-turn-helix	168	Helix-turn-helix	56.4346
c_000000000034	.	CDS	4388	5332	.	-	.	ID=WOLBACHIA___169;Name=PF01734.28;db_xref=Pfam:PF01734.28;product=Patatin-like phospholipase	169	Patatin-like phospholipase	46.2307
c_000000000035	.	CDS	3	1580	.	-	.	ID=WOLBACHIA___170	170		39.571
c_000000000035	.	CDS	1540	5331	.	-	.	ID=WOLBACHIA___171;Name=PF05593.20;db_xref=Pfam:PF05593.20;product=RHS Repeat	171	RHS Repeat	31.0475
c_000000000036	.	CDS	173	2734	.	+	.	ID=WOLBACHIA___172;Name=PF07724.20;db_xref=Pfam:PF07724.20;product=AAA domain (Cdc48 subfamily)	172	AAA domain (Cdc48 subfamily)	24.8638
c_000000000036	.	CDS	2762	3220	.	+	.	ID=WOLBACHIA___173;Name=PF21075.3;db_xref=Pfam:PF21075.3;product=Glutamate dehydrogenase ACT1 domain	173	Glutamate dehydrogenase ACT1 domain	29.0784
c_000000000037	.	CDS	3	1166	.	+	.	ID=WOLBACHIA___174;Name=PF00078.32;db_xref=Pfam:PF00078.32;product=Reverse transcriptase (RNA-dependent DNA polymerase)	174	Reverse transcriptase (RNA-dependent DNA polymerase)	23.4656

## Sheet: Intersections
Isolate1 ∩ PipPel ∩ PipSLAB ∩ WO	Isolate1 ∩ PipPel ∩ PipSLAB	Isolate1 ∩ PipPel	Isolate1 ∩ PipSLAB	PipPel ∩ PipSLAB	PipPel ∩ PipSLAB ∩ WO	PipPel ∩ WO	PipPel	PipSLAB
GC_00000001	GC_00000078	GC_00000110	GC_00000152	GC_00000006	GC_00000072	GC_00000085	GC_00001121	GC_00000111
GC_00000002	GC_00000106		GC_00000153	GC_00000007	GC_00000074	GC_00000151	GC_00001122	GC_00000212
GC_00000003	GC_00000120		GC_00000191	GC_00000022	GC_00000114	GC_00000522	GC_00001123	GC_00000222
GC_00000004	GC_00000121		GC_00000283	GC_00000057	GC_00000115	GC_00000534	GC_00001125	GC_00000265
GC_00000005	GC_00000124		GC_00000510	GC_00000067	GC_00000116	GC_00000563	GC_00001126	GC_00000375
GC_00000008	GC_00000125		GC_00000711	GC_00000080	GC_00000117	GC_00000678	GC_00001128	GC_00000413
GC_00000009	GC_00000126		GC_00001045	GC_00000104	GC_00000119	GC_00000699	GC_00001129	GC_00000481
GC_00000010	GC_00000129		GC_00001080	GC_00000112	GC_00000122	GC_00000742	GC_00001131	GC_00000496
GC_00000011	GC_00000130			GC_00000113	GC_00000123	GC_00000817	GC_00001133	GC_00000525
GC_00000012	GC_00000131			GC_00000118	GC_00000127	GC_00000831	GC_00001134	GC_00000529
GC_00000013	GC_00000132			GC_00000133	GC_00000128	GC_00001073	GC_00001137	GC_00000888
GC_00000014				GC_00000134		GC_00001086	GC_00001140	GC_00001003
GC_00000015				GC_00000135			GC_00001142	GC_00001029
GC_00000016				GC_00000136				GC_00001061
GC_00000017				GC_00000137				GC_00001124
GC_00000018				GC_00000138				GC_00001127
GC_00000019				GC_00000139				GC_00001130
GC_00000020				GC_00000140				GC_00001132
GC_00000021				GC_00000141				GC_00001135
GC_00000023				GC_00000142				GC_00001136
GC_00000024				GC_00000143				GC_00001138
GC_00000025				GC_00000144				GC_00001139
GC_00000026				GC_00000145				GC_00001143
GC_00000027				GC_00000146
GC_00000028				GC_00000147
GC_00000029				GC_00000148
GC_00000030				GC_00000149
GC_00000031				GC_00000150
GC_00000032				GC_00000154
GC_00000033				GC_00000155
GC_00000034				GC_00000156
GC_00000035				GC_00000157
GC_00000036				GC_00000158
GC_00000037				GC_00000159
GC_00000038				GC_00000160
GC_00000039				GC_00000161
GC_00000040				GC_00000162
GC_00000041				GC_00000163
GC_00000042				GC_00000164
GC_00000043				GC_00000165
GC_00000044				GC_00000166
GC_00000045				GC_00000167
GC_00000046				GC_00000168
GC_00000047				GC_00000169
GC_00000048				GC_00000170
GC_00000049				GC_00000171
GC_00000050				GC_00000172
GC_00000051				GC_00000173
GC_00000052				GC_00000174
GC_00000053				GC_00000175
GC_00000054				GC_00000176
GC_00000055				GC_00000177
GC_00000056				GC_00000178
GC_00000058				GC_00000179
GC_00000059				GC_00000180
GC_00000060				GC_00000181
GC_00000061				GC_00000182
GC_00000062				GC_00000183
GC_00000063				GC_00000184
GC_00000064				GC_00000185
GC_00000065				GC_00000186
GC_00000066				GC_00000187
GC_00000068				GC_00000188
GC_00000069				GC_00000189
GC_00000070				GC_00000190
GC_00000071				GC_00000192
GC_00000073				GC_00000193
GC_00000075				GC_00000194
GC_00000076				GC_00000195
GC_00000077				GC_00000196
GC_00000079				GC_00000197
GC_00000081				GC_00000198
GC_00000082				GC_00000199
GC_00000083				GC_00000200
GC_00000084				GC_00000201
GC_00000086				GC_00000202
GC_00000087				GC_00000203
GC_00000088				GC_00000204
GC_00000089				GC_00000205
GC_00000090				GC_00000206
GC_00000091				GC_00000207
GC_00000092				GC_00000208
GC_00000093				GC_00000209
GC_00000094				GC_00000210
GC_00000095				GC_00000211
GC_00000096				GC_00000213
GC_00000097				GC_00000214
GC_00000098				GC_00000215
GC_00000099				GC_00000216
GC_00000100				GC_00000217
GC_00000101				GC_00000218
GC_00000102				GC_00000219
GC_00000103				GC_00000220
GC_00000105				GC_00000221
GC_00000107				GC_00000223
GC_00000108				GC_00000224
GC_00000109				GC_00000225
				GC_00000226
				GC_00000227
				GC_00000228
				GC_00000229
				GC_00000230
				GC_00000231
				GC_00000232
				GC_00000233
				GC_00000234
				GC_00000235
				GC_00000236
				GC_00000237
				GC_00000238
				GC_00000239
				GC_00000240
				GC_00000241
				GC_00000242
				GC_00000243
				GC_00000244
				GC_00000245
				GC_00000246
				GC_00000247
				GC_00000248
				GC_00000249
				GC_00000250
				GC_00000251
				GC_00000252
				GC_00000253
				GC_00000254
				GC_00000255
				GC_00000256
				GC_00000257
				GC_00000258
				GC_00000259
				GC_00000260
				GC_00000261
				GC_00000262
				GC_00000263
				GC_00000264
				GC_00000266
				GC_00000267
				GC_00000268
				GC_00000269
				GC_00000270
				GC_00000271
				GC_00000272
				GC_00000273
				GC_00000274
				GC_00000275
				GC_00000276
				GC_00000277
				GC_00000278
				GC_00000279
				GC_00000280
				GC_00000281
				GC_00000282
				GC_00000284
				GC_00000285
				GC_00000286
				GC_00000287
				GC_00000288
				GC_00000289
				GC_00000290
				GC_00000291
				GC_00000292
				GC_00000293
				GC_00000294
				GC_00000295
				GC_00000296
				GC_00000297
				GC_00000298
				GC_00000299
				GC_00000300
				GC_00000301
				GC_00000302
				GC_00000303
				GC_00000304
				GC_00000305
				GC_00000306
				GC_00000307
				GC_00000308
				GC_00000309
				GC_00000310
				GC_00000311
				GC_00000312
				GC_00000313
				GC_00000314
				GC_00000315
				GC_00000316
				GC_00000317
				GC_00000318
				GC_00000319
				GC_00000320
				GC_00000321
				GC_00000322
				GC_00000323
				GC_00000324
				GC_00000325
				GC_00000326
				GC_00000327
				GC_00000328
				GC_00000329
				GC_00000330
				GC_00000331
				GC_00000332
				GC_00000333
				GC_00000334
				GC_00000335
				GC_00000336
				GC_00000337
				GC_00000338
				GC_00000339
				GC_00000340
				GC_00000341
				GC_00000342
				GC_00000343
				GC_00000344
				GC_00000345
				GC_00000346
				GC_00000347
				GC_00000348
				GC_00000349
				GC_00000350
				GC_00000351
				GC_00000352
				GC_00000353
				GC_00000354
				GC_00000355
				GC_00000356
				GC_00000357
				GC_00000358
				GC_00000359
				GC_00000360
				GC_00000361
				GC_00000362
				GC_00000363
				GC_00000364
				GC_00000365
				GC_00000366
				GC_00000367
				GC_00000368
				GC_00000369
				GC_00000370
				GC_00000371
				GC_00000372
				GC_00000373
				GC_00000374
				GC_00000376
				GC_00000377
				GC_00000378
				GC_00000379
				GC_00000380
				GC_00000381
				GC_00000382
				GC_00000383
				GC_00000384
				GC_00000385
				GC_00000386
				GC_00000387
				GC_00000388
				GC_00000389
				GC_00000390
				GC_00000391
				GC_00000392
				GC_00000393
				GC_00000394
				GC_00000395
				GC_00000396
				GC_00000397
				GC_00000398
				GC_00000399
				GC_00000400
				GC_00000401
				GC_00000402
				GC_00000403
				GC_00000404
				GC_00000405
				GC_00000406
				GC_00000407
				GC_00000408
				GC_00000409
				GC_00000410
				GC_00000411
				GC_00000412
				GC_00000414
				GC_00000415
				GC_00000416
				GC_00000417
				GC_00000418
				GC_00000419
				GC_00000420
				GC_00000421
				GC_00000422
				GC_00000423
				GC_00000424
				GC_00000425
				GC_00000426
				GC_00000427
				GC_00000428
				GC_00000429
				GC_00000430
				GC_00000431
				GC_00000432
				GC_00000433
				GC_00000434
				GC_00000435
				GC_00000436
				GC_00000437
				GC_00000438
				GC_00000439
				GC_00000440
				GC_00000441
				GC_00000442
				GC_00000443
				GC_00000444
				GC_00000445
				GC_00000446
				GC_00000447
				GC_00000448
				GC_00000449
				GC_00000450
				GC_00000451
				GC_00000452
				GC_00000453
				GC_00000454
				GC_00000455
				GC_00000456
				GC_00000457
				GC_00000458
				GC_00000459
				GC_00000460
				GC_00000461
				GC_00000462
				GC_00000463
				GC_00000464
				GC_00000465
				GC_00000466
				GC_00000467
				GC_00000468
				GC_00000469
				GC_00000470
				GC_00000471
				GC_00000472
				GC_00000473
				GC_00000474
				GC_00000475
				GC_00000476
				GC_00000477
				GC_00000478
				GC_00000479
				GC_00000480
				GC_00000482
				GC_00000483
				GC_00000484
				GC_00000485
				GC_00000486
				GC_00000487
				GC_00000488
				GC_00000489
				GC_00000490
				GC_00000491
				GC_00000492
				GC_00000493
				GC_00000494
				GC_00000495
				GC_00000497
				GC_00000498
				GC_00000499
				GC_00000500
				GC_00000501
				GC_00000502
				GC_00000503
				GC_00000504
				GC_00000505
				GC_00000506
				GC_00000507
				GC_00000508
				GC_00000509
				GC_00000511
				GC_00000512
				GC_00000513
				GC_00000514
				GC_00000515
				GC_00000516
				GC_00000517
				GC_00000518
				GC_00000519
				GC_00000520
				GC_00000521
				GC_00000523
				GC_00000524
				GC_00000526
				GC_00000527
				GC_00000528
				GC_00000530
				GC_00000531
				GC_00000532
				GC_00000533
				GC_00000535
				GC_00000536
				GC_00000537
				GC_00000538
				GC_00000539
				GC_00000540
				GC_00000541
				GC_00000542
				GC_00000543
				GC_00000544
				GC_00000545
				GC_00000546
				GC_00000547
				GC_00000548
				GC_00000549
				GC_00000550
				GC_00000551
				GC_00000552
				GC_00000553
				GC_00000554
				GC_00000555
				GC_00000556
				GC_00000557
				GC_00000558
				GC_00000559
				GC_00000560
				GC_00000561
				GC_00000562
				GC_00000564
				GC_00000565
				GC_00000566
				GC_00000567
				GC_00000568
				GC_00000569
				GC_00000570
				GC_00000571
				GC_00000572
				GC_00000573
				GC_00000574
				GC_00000575
				GC_00000576
				GC_00000577
				GC_00000578
				GC_00000579
				GC_00000580
				GC_00000581
				GC_00000582
				GC_00000583
				GC_00000584
				GC_00000585
				GC_00000586
				GC_00000587
				GC_00000588
				GC_00000589
				GC_00000590
				GC_00000591
				GC_00000592
				GC_00000593
				GC_00000594
				GC_00000595
				GC_00000596
				GC_00000597
				GC_00000598
				GC_00000599
				GC_00000600
				GC_00000601
				GC_00000602
				GC_00000603
				GC_00000604
				GC_00000605
				GC_00000606
				GC_00000607
				GC_00000608
				GC_00000609
				GC_00000610
				GC_00000611
				GC_00000612
				GC_00000613
				GC_00000614
				GC_00000615
				GC_00000616
				GC_00000617
				GC_00000618
				GC_00000619
				GC_00000620
				GC_00000621
				GC_00000622
				GC_00000623
				GC_00000624
				GC_00000625
				GC_00000626
				GC_00000627
				GC_00000628
				GC_00000629
				GC_00000630
				GC_00000631
				GC_00000632
				GC_00000633
				GC_00000634
				GC_00000635
				GC_00000636
				GC_00000637
				GC_00000638
				GC_00000639
				GC_00000640
				GC_00000641
				GC_00000642
				GC_00000643
				GC_00000644
				GC_00000645
				GC_00000646
				GC_00000647
				GC_00000648
				GC_00000649
				GC_00000650
				GC_00000651
				GC_00000652
				GC_00000653
				GC_00000654
				GC_00000655
				GC_00000656
				GC_00000657
				GC_00000658
				GC_00000659
				GC_00000660
				GC_00000661
				GC_00000662
				GC_00000663
				GC_00000664
				GC_00000665
				GC_00000666
				GC_00000667
				GC_00000668
				GC_00000669
				GC_00000670
				GC_00000671
				GC_00000672
				GC_00000673
				GC_00000674
				GC_00000675
				GC_00000676
				GC_00000677
				GC_00000679
				GC_00000680
				GC_00000681
				GC_00000682
				GC_00000683
				GC_00000684
				GC_00000685
				GC_00000686
				GC_00000687
				GC_00000688
				GC_00000689
				GC_00000690
				GC_00000691
				GC_00000692
				GC_00000693
				GC_00000694
				GC_00000695
				GC_00000696
				GC_00000697
				GC_00000698
				GC_00000700
				GC_00000701
				GC_00000702
				GC_00000703
				GC_00000704
				GC_00000705
				GC_00000706
				GC_00000707
				GC_00000708
				GC_00000709
				GC_00000710
				GC_00000712
				GC_00000713
				GC_00000714
				GC_00000715
				GC_00000716
				GC_00000717
				GC_00000718
				GC_00000719
				GC_00000720
				GC_00000721
				GC_00000722
				GC_00000723
				GC_00000724
				GC_00000725
				GC_00000726
				GC_00000727
				GC_00000728
				GC_00000729
				GC_00000730
				GC_00000731
				GC_00000732
				GC_00000733
				GC_00000734
				GC_00000735
				GC_00000736
				GC_00000737
				GC_00000738
				GC_00000739
				GC_00000740
				GC_00000741
				GC_00000743
				GC_00000744
				GC_00000745
				GC_00000746
				GC_00000747
				GC_00000748
				GC_00000749
				GC_00000750
				GC_00000751
				GC_00000752
				GC_00000753
				GC_00000754
				GC_00000755
				GC_00000756
				GC_00000757
				GC_00000758
				GC_00000759
				GC_00000760
				GC_00000761
				GC_00000762
				GC_00000763
				GC_00000764
				GC_00000765
				GC_00000766
				GC_00000767
				GC_00000768
				GC_00000769
				GC_00000770
				GC_00000771
				GC_00000772
				GC_00000773
				GC_00000774
				GC_00000775
				GC_00000776
				GC_00000777
				GC_00000778
				GC_00000779
				GC_00000780
				GC_00000781
				GC_00000782
				GC_00000783
				GC_00000784
				GC_00000785
				GC_00000786
				GC_00000787
				GC_00000788
				GC_00000789
				GC_00000790
				GC_00000791
				GC_00000792
				GC_00000793
				GC_00000794
				GC_00000795
				GC_00000796
				GC_00000797
				GC_00000798
				GC_00000799
				GC_00000800
				GC_00000801
				GC_00000802
				GC_00000803
				GC_00000804
				GC_00000805
				GC_00000806
				GC_00000807
				GC_00000808
				GC_00000809
				GC_00000810
				GC_00000811
				GC_00000812
				GC_00000813
				GC_00000814
				GC_00000815
				GC_00000816
				GC_00000818
				GC_00000819
				GC_00000820
				GC_00000821
				GC_00000822
				GC_00000823
				GC_00000824
				GC_00000825
				GC_00000826
				GC_00000827
				GC_00000828
				GC_00000829
				GC_00000830
				GC_00000832
				GC_00000833
				GC_00000834
				GC_00000835
				GC_00000836
				GC_00000837
				GC_00000838
				GC_00000839
				GC_00000840
				GC_00000841
				GC_00000842
				GC_00000843
				GC_00000844
				GC_00000845
				GC_00000846
				GC_00000847
				GC_00000848
				GC_00000849
				GC_00000850
				GC_00000851
				GC_00000852
				GC_00000853
				GC_00000854
				GC_00000855
				GC_00000856
				GC_00000857
				GC_00000858
				GC_00000859
				GC_00000860
				GC_00000861
				GC_00000862
				GC_00000863
				GC_00000864
				GC_00000865
				GC_00000866
				GC_00000867
				GC_00000868
				GC_00000869
				GC_00000870
				GC_00000871
				GC_00000872
				GC_00000873
				GC_00000874
				GC_00000875
				GC_00000876
				GC_00000877
				GC_00000878
				GC_00000879
				GC_00000880
				GC_00000881
				GC_00000882
				GC_00000883
				GC_00000884
				GC_00000885
				GC_00000886
				GC_00000887
				GC_00000889
				GC_00000890
				GC_00000891
				GC_00000892
				GC_00000893
				GC_00000894
				GC_00000895
				GC_00000896
				GC_00000897
				GC_00000898
				GC_00000899
				GC_00000900
				GC_00000901
				GC_00000902
				GC_00000903
				GC_00000904
				GC_00000905
				GC_00000906
				GC_00000907
				GC_00000908
				GC_00000909
				GC_00000910
				GC_00000911
				GC_00000912
				GC_00000913
				GC_00000914
				GC_00000915
				GC_00000916
				GC_00000917
				GC_00000918
				GC_00000919
				GC_00000920
				GC_00000921
				GC_00000922
				GC_00000923
				GC_00000924
				GC_00000925
				GC_00000926
				GC_00000927
				GC_00000928
				GC_00000929
				GC_00000930
				GC_00000931
				GC_00000932
				GC_00000933
				GC_00000934
				GC_00000935
				GC_00000936
				GC_00000937
				GC_00000938
				GC_00000939
				GC_00000940
				GC_00000941
				GC_00000942
				GC_00000943
				GC_00000944
				GC_00000945
				GC_00000946
				GC_00000947
				GC_00000948
				GC_00000949
				GC_00000950
				GC_00000951
				GC_00000952
				GC_00000953
				GC_00000954
				GC_00000955
				GC_00000956
				GC_00000957
				GC_00000958
				GC_00000959
				GC_00000960
				GC_00000961
				GC_00000962
				GC_00000963
				GC_00000964
				GC_00000965
				GC_00000966
				GC_00000967
				GC_00000968
				GC_00000969
				GC_00000970
				GC_00000971
				GC_00000972
				GC_00000973
				GC_00000974
				GC_00000975
				GC_00000976
				GC_00000977
				GC_00000978
				GC_00000979
				GC_00000980
				GC_00000981
				GC_00000982
				GC_00000983
				GC_00000984
				GC_00000985
				GC_00000986
				GC_00000987
				GC_00000988
				GC_00000989
				GC_00000990
				GC_00000991
				GC_00000992
				GC_00000993
				GC_00000994
				GC_00000995
				GC_00000996
				GC_00000997
				GC_00000998
				GC_00000999
				GC_00001001
				GC_00001002
				GC_00001004
				GC_00001005
				GC_00001006
				GC_00001007
				GC_00001008
				GC_00001009
				GC_00001010
				GC_00001011
				GC_00001012
				GC_00001013
				GC_00001014
				GC_00001015
				GC_00001016
				GC_00001017
				GC_00001018
				GC_00001019
				GC_00001020
				GC_00001021
				GC_00001022
				GC_00001023
				GC_00001024
				GC_00001025
				GC_00001026
				GC_00001027
				GC_00001028
				GC_00001030
				GC_00001031
				GC_00001032
				GC_00001033
				GC_00001034
				GC_00001035
				GC_00001036
				GC_00001037
				GC_00001038
				GC_00001039
				GC_00001040
				GC_00001041
				GC_00001042
				GC_00001043
				GC_00001044
				GC_00001046
				GC_00001047
				GC_00001048
				GC_00001049
				GC_00001050
				GC_00001051
				GC_00001052
				GC_00001053
				GC_00001054
				GC_00001055
				GC_00001056
				GC_00001057
				GC_00001058
				GC_00001059
				GC_00001060
				GC_00001062
				GC_00001063
				GC_00001064
				GC_00001065
				GC_00001066
				GC_00001067
				GC_00001068
				GC_00001069
				GC_00001070
				GC_00001071
				GC_00001072
				GC_00001074
				GC_00001075
				GC_00001076
				GC_00001077
				GC_00001078
				GC_00001079
				GC_00001081
				GC_00001082
				GC_00001083
				GC_00001084
				GC_00001085
				GC_00001087
				GC_00001088
				GC_00001089
				GC_00001090
				GC_00001091
				GC_00001092
				GC_00001093
				GC_00001094
				GC_00001095
				GC_00001096
				GC_00001097
				GC_00001098
				GC_00001099
				GC_00001100
				GC_00001101
				GC_00001102
				GC_00001103
				GC_00001104
				GC_00001105
				GC_00001106
				GC_00001107
				GC_00001108
				GC_00001109
				GC_00001110
				GC_00001111
				GC_00001112
				GC_00001113
				GC_00001114
				GC_00001115
				GC_00001116
				GC_00001117
				GC_00001118
				GC_00001119
				GC_00001120

## Sheet: Isolate1 ∩ PipPel ∩ PipSLAB ∩WO
GENE_CLUSTER	ID	GFF COLUMNS	2_y	3_y	4	6	8	ISOLATE COV / ISOLATE	PROTEIN
GC_00000023	c_000000000002	1	CDS	2	340	+	ID=formatted_Wolbachia_contigs___1	24.531
GC_00000069	c_000000000002	2	CDS	436	1434	-	ID=formatted_Wolbachia_contigs___2;Name=PF01381.28;db_xref=Pfam:PF01381.28;product=Helix-turn-helix	32.1802	Helix-turn-helix
GC_00000066	c_000000000002	3	CDS	1470	2378	-	ID=formatted_Wolbachia_contigs___3;Name=PF01381.28;db_xref=Pfam:PF01381.28;product=Helix-turn-helix	24.0198	Helix-turn-helix
GC_00000001	c_000000000003	4	CDS	1	75	+	ID=formatted_Wolbachia_contigs___4	13.0267
GC_00000068	c_000000000003	5	CDS	110	2098	+	ID=formatted_Wolbachia_contigs___5;Name=PF12796.13;db_xref=Pfam:PF12796.13;product=Ankyrin repeats (3 copies)	46.4072	Ankyrin repeats (3 copies)
GC_00000066	c_000000000004	6	CDS	210	1130	-	ID=formatted_Wolbachia_contigs___6;Name=PF01381.28;db_xref=Pfam:PF01381.28;product=Helix-turn-helix	63.4148	Helix-turn-helix
GC_00000056	c_000000000004	7	CDS	1198	3069	-	ID=formatted_Wolbachia_contigs___7;Name=PF01119.25;db_xref=Pfam:PF01119.25;product=DNA mismatch repair protein C-terminal domain	48.9316	DNA mismatch repair protein C-terminal domain
GC_00000065	c_000000000004	8	CDS	3060	3617	-	ID=formatted_Wolbachia_contigs___8;Name=PF00075.30;db_xref=Pfam:PF00075.30;product=RNase H	59.3172	RNase H
GC_00000021	c_000000000004	9	CDS	4010	4918	+	ID=formatted_Wolbachia_contigs___9;Name=PF12784.13;db_xref=Pfam:PF12784.13;product=PD-(D/E)XK nuclease family transposase	58.1573	PD-(D/E)XK nuclease family transposase
GC_00000071	c_000000000004	10	CDS	4990	6348	+	ID=formatted_Wolbachia_contigs___10	48.535
GC_00000079	c_000000000005	11	CDS	334	2673	+	ID=formatted_Wolbachia_contigs___11	28.2778
GC_00000001	c_000000000006	13	CDS	815	1795	-	ID=formatted_Wolbachia_contigs___13;Name=PF00872.24;db_xref=Pfam:PF00872.24;product=Transposase Mutator family	115.664	Transposase Mutator family
GC_00000001	c_000000000006	14	CDS	1805	2053	-	ID=formatted_Wolbachia_contigs___14	132.446
GC_00000068	c_000000000006	15	CDS	2077	4143	-	ID=formatted_Wolbachia_contigs___15	52.1529
GC_00000079	c_000000000007	16	CDS	3	1328	+	ID=formatted_Wolbachia_contigs___16	28.0415
GC_00000101	c_000000000007	17	CDS	1388	1855	+	ID=formatted_Wolbachia_contigs___17	27.3718
GC_00000040	c_000000000007	18	CDS	2059	3006	+	ID=formatted_Wolbachia_contigs___18;Name=PF01548.23;db_xref=Pfam:PF01548.23;product=Transposase	55.904	Transposase
GC_00000039	c_000000000007	19	CDS	3237	4103	+	ID=formatted_Wolbachia_contigs___19	24.6747
GC_00000071	c_000000000008	20	CDS	3	650	+	ID=formatted_Wolbachia_contigs___20	31.0972
GC_00000046	c_000000000008	21	CDS	704	3286	+	ID=formatted_Wolbachia_contigs___21	62.3415
GC_00000010	c_000000000009	22	CDS	1	546	+	ID=formatted_Wolbachia_contigs___22;Name=PF04865.19;db_xref=Pfam:PF04865.19;product=Baseplate J-like protein	207.467	Baseplate J-like protein
GC_00000012	c_000000000009	23	CDS	810	1976	+	ID=formatted_Wolbachia_contigs___23;Name=PF09684.15;db_xref=Pfam:PF09684.15;product=Phage tail protein (Tail_P2_I)	261.004	Phage tail protein (Tail_P2_I)
GC_00000034	c_000000000009	24	CDS	2144	2854	+	ID=formatted_Wolbachia_contigs___24;Name=PF00023.36;db_xref=Pfam:PF00023.36;product=Ankyrin repeat	237.71	Ankyrin repeat
GC_00000044	c_000000000009	25	CDS	2880	3329	+	ID=formatted_Wolbachia_contigs___25;Name=PF00023.36;db_xref=Pfam:PF00023.36;product=Ankyrin repeat	255.807	Ankyrin repeat
GC_00000047	c_000000000009	26	CDS	3334	3765	+	ID=formatted_Wolbachia_contigs___26;Name=PF11149.13;db_xref=Pfam:PF11149.13;product=Protein of unknown function (DUF2924)	279.44	Protein of unknown function (DUF2924)
GC_00000020	c_000000000009	27	CDS	3775	5262	+	ID=formatted_Wolbachia_contigs___27;Name=PF00239.26;db_xref=Pfam:PF00239.26;product=Resolvase N terminal domain	221.067	Resolvase N terminal domain
GC_00000088	c_000000000009	28	CDS	5586	8342	-	ID=formatted_Wolbachia_contigs___28;Name=PF12796.13;db_xref=Pfam:PF12796.13;product=Ankyrin repeats (3 copies)	104.467	Ankyrin repeats (3 copies)
GC_00000087	c_000000000009	29	CDS	8552	9565	-	ID=formatted_Wolbachia_contigs___29;Name=PF06271.18;db_xref=Pfam:PF06271.18;product=RDD family	110.484	RDD family
GC_00000102	c_000000000009	30	CDS	10233	16760	+	ID=formatted_Wolbachia_contigs___30;Name=PF13424.12;db_xref=Pfam:PF13424.12;product=Tetratricopeptide repeat	69.9352	Tetratricopeptide repeat
GC_00000081	c_000000000010	31	CDS	3	896	-	ID=formatted_Wolbachia_contigs___31;Name=PF05136.18;db_xref=Pfam:PF05136.18;product=Phage portal protein lambda family	202.518	Phage portal protein lambda family
GC_00000105	c_000000000010	32	CDS	1065	2948	-	ID=formatted_Wolbachia_contigs___32	80.8508
GC_00000026	c_000000000010	33	CDS	3082	3162	-	ID=formatted_Wolbachia_contigs___33	160.185
GC_00000019	c_000000000011	34	CDS	2	154	+	ID=formatted_Wolbachia_contigs___34	323.288
GC_00000077	c_000000000011	35	CDS	154	1212	+	ID=formatted_Wolbachia_contigs___35;Name=PF06250.17;db_xref=Pfam:PF06250.17;product=YhcG PDDEXK nuclease domain	492.697	YhcG PDDEXK nuclease domain
GC_00000009	c_000000000011	36	CDS	1212	2624	+	ID=formatted_Wolbachia_contigs___36;Name=PF05136.18;db_xref=Pfam:PF05136.18;product=Phage portal protein lambda family	692.509	Phage portal protein lambda family
GC_00000003	c_000000000011	37	CDS	2639	3676	+	ID=formatted_Wolbachia_contigs___37;Name=PF01343.23;db_xref=Pfam:PF01343.23;product=Peptidase family S49	629.945	Peptidase family S49
GC_00000013	c_000000000011	38	CDS	3802	4173	+	ID=formatted_Wolbachia_contigs___38;Name=PF02924.19;db_xref=Pfam:PF02924.19;product=Bacteriophage lambda head decoration protein D	513.747	Bacteriophage lambda head decoration protein D
GC_00000004	c_000000000011	39	CDS	4199	4282	+	ID=formatted_Wolbachia_contigs___39	191.131
GC_00000107	c_000000000012	40	CDS	806	2224	+	ID=formatted_Wolbachia_contigs___40;Name=PF01637.24;db_xref=Pfam:PF01637.24;product=ATPase domain predominantly from Archaea	18.8591	ATPase domain predominantly from Archaea
GC_00000034	c_000000000013	41	CDS	1	246	-	ID=formatted_Wolbachia_contigs___41;Name=PF13637.12;db_xref=Pfam:PF13637.12;product=Ankyrin repeats (many copies)	30.8293	Ankyrin repeats (many copies)
GC_00000082	c_000000000013	42	CDS	258	1559	-	ID=formatted_Wolbachia_contigs___42;Name=PF00078.32;db_xref=Pfam:PF00078.32;product=Reverse transcriptase (RNA-dependent DNA polymerase)	48.0469	Reverse transcriptase (RNA-dependent DNA polymerase)
GC_00000103	c_000000000013	43	CDS	1730	2056	-	ID=formatted_Wolbachia_contigs___43	45.9541
GC_00000039	c_000000000014	44	CDS	3	2546	-	ID=formatted_Wolbachia_contigs___44	27.489
GC_00000010	c_000000000015	45	CDS	1	150	+	ID=formatted_Wolbachia_contigs___45	30.2733
GC_00000012	c_000000000015	47	CDS	1167	1445	+	ID=formatted_Wolbachia_contigs___47;Name=PF09684.15;db_xref=Pfam:PF09684.15;product=Phage tail protein (Tail_P2_I)	36.0323	Phage tail protein (Tail_P2_I)
GC_00000005	c_000000000018	50	CDS	1	150	-	ID=formatted_Wolbachia_contigs___50	271.18
GC_00000032	c_000000000018	51	CDS	147	1619	-	ID=formatted_Wolbachia_contigs___51;Name=PF12796.13;db_xref=Pfam:PF12796.13;product=Ankyrin repeats (3 copies)	343.359	Ankyrin repeats (3 copies)
GC_00000030	c_000000000018	52	CDS	1619	1942	-	ID=formatted_Wolbachia_contigs___52	322.355
GC_00000015	c_000000000019	53	CDS	332	754	-	ID=formatted_Wolbachia_contigs___53;Name=PF13610.12;db_xref=Pfam:PF13610.12;product=DDE domain	80.2742	DDE domain
GC_00000095	c_000000000019	54	CDS	1167	1577	-	ID=formatted_Wolbachia_contigs___54;Name=PF13358.12;db_xref=Pfam:PF13358.12;product=DDE superfamily endonuclease	42.7397	DDE superfamily endonuclease
GC_00000083	c_000000000019	55	CDS	1651	2169	-	ID=formatted_Wolbachia_contigs___55;Name=PF13592.12;db_xref=Pfam:PF13592.12;product=Winged helix-turn helix	47.4933	Winged helix-turn helix
GC_00000020	c_000000000020	56	CDS	2	505	+	ID=formatted_Wolbachia_contigs___56;Name=PF13408.12;db_xref=Pfam:PF13408.12;product=Recombinase zinc beta ribbon domain	53.8016	Recombinase zinc beta ribbon domain
GC_00000001	c_000000000020	57	CDS	613	1851	-	ID=formatted_Wolbachia_contigs___57;Name=PF00872.24;db_xref=Pfam:PF00872.24;product=Transposase Mutator family	35.4649	Transposase Mutator family
GC_00000001	c_000000000020	58	CDS	1908	2444	-	ID=formatted_Wolbachia_contigs___58;Name=PF00872.24;db_xref=Pfam:PF00872.24;product=Transposase Mutator family	84.013	Transposase Mutator family
GC_00000001	c_000000000020	59	CDS	2416	3084	-	ID=formatted_Wolbachia_contigs___59;Name=PF00872.24;db_xref=Pfam:PF00872.24;product=Transposase Mutator family	61.2123	Transposase Mutator family
GC_00000070	c_000000000020	61	CDS	3751	7818	-	ID=formatted_Wolbachia_contigs___61;Name=PF12796.13;db_xref=Pfam:PF12796.13;product=Ankyrin repeats (3 copies)	43.8031	Ankyrin repeats (3 copies)
GC_00000004	c_000000000021	62	CDS	2	274	+	ID=formatted_Wolbachia_contigs___62;Name=PF03864.22;db_xref=Pfam:PF03864.22;product=Phage major capsid protein E	371.967	Phage major capsid protein E
GC_00000028	c_000000000021	63	CDS	349	654	+	ID=formatted_Wolbachia_contigs___63;Name=PF05354.17;db_xref=Pfam:PF05354.17;product=Phage Head-Tail Attachment protein	555.131	Phage Head-Tail Attachment protein
GC_00000011	c_000000000021	64	CDS	656	1147	+	ID=formatted_Wolbachia_contigs___64;Name=PF06763.17;db_xref=Pfam:PF06763.17;product=Prophage minor tail protein Z (GPZ)	533.478	Prophage minor tail protein Z (GPZ)
GC_00000014	c_000000000021	65	CDS	1144	1620	+	ID=formatted_Wolbachia_contigs___65	516.516
GC_00000018	c_000000000021	66	CDS	1607	2071	+	ID=formatted_Wolbachia_contigs___66;Name=PF04717.18;db_xref=Pfam:PF04717.18;product=Type VI secretion system/phage-baseplate injector OB domain	547.852	Type VI secretion system/phage-baseplate injector OB domain
GC_00000017	c_000000000021	67	CDS	2071	2325	+	ID=formatted_Wolbachia_contigs___67;Name=PF05488.18;db_xref=Pfam:PF05488.18;product=PAAR motif	555.024	PAAR motif
GC_00000100	c_000000000021	68	CDS	2309	2779	+	ID=formatted_Wolbachia_contigs___68;Name=PF17761.7;db_xref=Pfam:PF17761.7;product=DUF1016 N-terminal domain	548.675	DUF1016 N-terminal domain
GC_00000064	c_000000000021	69	CDS	2828	3160	+	ID=formatted_Wolbachia_contigs___69;Name=PF13340.11;db_xref=Pfam:PF13340.11;product=Putative transposase of IS4/5 family (DUF4096)	523.393	Putative transposase of IS4/5 family (DUF4096)
GC_00000061	c_000000000021	70	CDS	3264	3620	+	ID=formatted_Wolbachia_contigs___70;Name=PF01609.27;db_xref=Pfam:PF01609.27;product=Transposase DDE domain	528.171	Transposase DDE domain
GC_00000096	c_000000000021	71	CDS	3716	5698	-	ID=formatted_Wolbachia_contigs___71;Name=PF12796.13;db_xref=Pfam:PF12796.13;product=Ankyrin repeats (3 copies)	537.808	Ankyrin repeats (3 copies)
GC_00000108	c_000000000021	72	CDS	6615	17276	+	ID=formatted_Wolbachia_contigs___72;Name=PF12796.13;db_xref=Pfam:PF12796.13;product=Ankyrin repeats (3 copies)	67.5207	Ankyrin repeats (3 copies)
GC_00000063	c_000000000022	74	CDS	649	1560	-	ID=formatted_Wolbachia_contigs___74;Name=PF12784.13;db_xref=Pfam:PF12784.13;product=PD-(D/E)XK nuclease family transposase	50.2785	PD-(D/E)XK nuclease family transposase
GC_00000035	c_000000000022	75	CDS	1689	2237	+	ID=formatted_Wolbachia_contigs___75;Name=PF13443.12;db_xref=Pfam:PF13443.12;product=Cro/C1-type HTH DNA-binding domain	35.2732	Cro/C1-type HTH DNA-binding domain
GC_00000025	c_000000000022	76	CDS	2264	2614	+	ID=formatted_Wolbachia_contigs___76	33.3048
GC_00000019	c_000000000023	77	CDS	2	154	+	ID=formatted_Wolbachia_contigs___77	426.301
GC_00000009	c_000000000023	78	CDS	155	1573	+	ID=formatted_Wolbachia_contigs___78;Name=PF05136.18;db_xref=Pfam:PF05136.18;product=Phage portal protein lambda family	450.13	Phage portal protein lambda family
GC_00000003	c_000000000023	79	CDS	1573	2238	+	ID=formatted_Wolbachia_contigs___79;Name=PF01343.23;db_xref=Pfam:PF01343.23;product=Peptidase family S49	622.644	Peptidase family S49
GC_00000005	c_000000000024	80	CDS	1	150	-	ID=formatted_Wolbachia_contigs___80	540.54
GC_00000032	c_000000000024	81	CDS	147	1610	-	ID=formatted_Wolbachia_contigs___81;Name=PF12796.13;db_xref=Pfam:PF12796.13;product=Ankyrin repeats (3 copies)	957.139	Ankyrin repeats (3 copies)
GC_00000030	c_000000000024	82	CDS	1631	2116	-	ID=formatted_Wolbachia_contigs___82	1088.75
GC_00000026	c_000000000024	83	CDS	2124	3344	-	ID=formatted_Wolbachia_contigs___83;Name=PF01555.25;db_xref=Pfam:PF01555.25;product=DNA methylase	1410.21	DNA methylase
GC_00000027	c_000000000024	84	CDS	3454	3909	-	ID=formatted_Wolbachia_contigs___84	191.553
GC_00000109	c_000000000024	85	CDS	4172	6304	+	ID=formatted_Wolbachia_contigs___85;Name=PF13481.12;db_xref=Pfam:PF13481.12;product=AAA domain	159.318	AAA domain
GC_00000099	c_000000000024	88	CDS	8559	9083	+	ID=formatted_Wolbachia_contigs___88;Name=PF13518.12;db_xref=Pfam:PF13518.12;product=Helix-turn-helix domain	170.347	Helix-turn-helix domain
GC_00000033	c_000000000024	89	CDS	9144	9968	+	ID=formatted_Wolbachia_contigs___89;Name=PF13479.12;db_xref=Pfam:PF13479.12;product=AAA domain	152.692	AAA domain
GC_00000016	c_000000000024	90	CDS	9985	10791	+	ID=formatted_Wolbachia_contigs___90;Name=PF13481.12;db_xref=Pfam:PF13481.12;product=AAA domain	156.123	AAA domain
GC_00000036	c_000000000024	91	CDS	10831	11331	+	ID=formatted_Wolbachia_contigs___91	151.383
GC_00000086	c_000000000024	92	CDS	11374	13122	+	ID=formatted_Wolbachia_contigs___92;Name=PF13481.12;db_xref=Pfam:PF13481.12;product=AAA domain	159.337	AAA domain
GC_00000084	c_000000000024	93	CDS	13129	14265	-	ID=formatted_Wolbachia_contigs___93	173.501
GC_00000073	c_000000000024	94	CDS	14207	15418	-	ID=formatted_Wolbachia_contigs___94	172.77
GC_00000045	c_000000000024	95	CDS	15559	16242	+	ID=formatted_Wolbachia_contigs___95;Name=PF25691.1;db_xref=Pfam:PF25691.1;product=Baseplate wedge 3 tail fiber network component	156.887	Baseplate wedge 3 tail fiber network component
GC_00000049	c_000000000024	96	CDS	16249	18201	+	ID=formatted_Wolbachia_contigs___96;Name=PF16075.10;db_xref=Pfam:PF16075.10;product=Domain of unknown function (DUF4815)	157.807	Domain of unknown function (DUF4815)
GC_00000062	c_000000000024	97	CDS	18213	19400	+	ID=formatted_Wolbachia_contigs___97	180.235
GC_00000060	c_000000000024	98	CDS	19405	19608	+	ID=formatted_Wolbachia_contigs___98	198.26
GC_00000042	c_000000000024	99	CDS	19595	21022	+	ID=formatted_Wolbachia_contigs___99	180.919
GC_00000048	c_000000000024	100	CDS	21198	22376	+	ID=formatted_Wolbachia_contigs___100;Name=PF04984.19;db_xref=Pfam:PF04984.19;product=Phage tail sheath protein subtilisin-like domain	171.745	Phage tail sheath protein subtilisin-like domain
GC_00000055	c_000000000024	101	CDS	22394	22900	+	ID=formatted_Wolbachia_contigs___101;Name=PF04985.20;db_xref=Pfam:PF04985.20;product=Phage tail tube protein FII	181.195	Phage tail tube protein FII
GC_00000052	c_000000000024	102	CDS	22947	23204	+	ID=formatted_Wolbachia_contigs___102;Name=PF10109.15;db_xref=Pfam:PF10109.15;product=Phage tail assembly chaperone proteins E or 41 or 14	188.957	Phage tail assembly chaperone proteins E or 41 or 14
GC_00000054	c_000000000024	103	CDS	23314	25563	+	ID=formatted_Wolbachia_contigs___103;Name=PF10145.14;db_xref=Pfam:PF10145.14;product=Phage-related minor tail protein	165.762	Phage-related minor tail protein
GC_00000051	c_000000000024	104	CDS	25563	25919	+	ID=formatted_Wolbachia_contigs___104;Name=PF06995.16;db_xref=Pfam:PF06995.16;product=Phage P2 GpU	169.689	Phage P2 GpU
GC_00000053	c_000000000024	105	CDS	25916	26125	+	ID=formatted_Wolbachia_contigs___105;Name=PF05489.18;db_xref=Pfam:PF05489.18;product=Phage Tail Protein X	179.348	Phage Tail Protein X
GC_00000050	c_000000000024	106	CDS	26126	27061	+	ID=formatted_Wolbachia_contigs___106	184.416
GC_00000043	c_000000000024	107	CDS	27118	27642	+	ID=formatted_Wolbachia_contigs___107;Name=PF12796.13;db_xref=Pfam:PF12796.13;product=Ankyrin repeats (3 copies)	132.657	Ankyrin repeats (3 copies)
GC_00000008	c_000000000024	108	CDS	27781	28161	+	ID=formatted_Wolbachia_contigs___108;Name=PF01710.22;db_xref=Pfam:PF01710.22;product=Transposase	95.9396	Transposase
GC_00000029	c_000000000024	109	CDS	28158	28640	+	ID=formatted_Wolbachia_contigs___109;Name=PF13358.12;db_xref=Pfam:PF13358.12;product=DDE superfamily endonuclease	119.433	DDE superfamily endonuclease
GC_00000037	c_000000000024	110	CDS	28656	28859	+	ID=formatted_Wolbachia_contigs___110	146.191
GC_00000038	c_000000000024	111	CDS	28860	29366	-	ID=formatted_Wolbachia_contigs___111;Name=PF13091.12;db_xref=Pfam:PF13091.12;product=PLD-like domain	109.247	PLD-like domain
GC_00000023	c_000000000024	112	CDS	29372	30295	+	ID=formatted_Wolbachia_contigs___112;Name=PF01734.28;db_xref=Pfam:PF01734.28;product=Patatin-like phospholipase	122.508	Patatin-like phospholipase
GC_00000069	c_000000000024	113	CDS	30376	31287	-	ID=formatted_Wolbachia_contigs___113;Name=PF01381.28;db_xref=Pfam:PF01381.28;product=Helix-turn-helix	135.28	Helix-turn-helix
GC_00000098	c_000000000024	114	CDS	31313	32215	-	ID=formatted_Wolbachia_contigs___114;Name=PF01381.28;db_xref=Pfam:PF01381.28;product=Helix-turn-helix	110.751	Helix-turn-helix
GC_00000076	c_000000000024	115	CDS	32316	33500	-	ID=formatted_Wolbachia_contigs___115	102.995
GC_00000031	c_000000000024	116	CDS	33608	34057	-	ID=formatted_Wolbachia_contigs___116;Name=PF04002.20;db_xref=Pfam:PF04002.20;product=RadC-like JAB domain	82.2867	RadC-like JAB domain
GC_00000031	c_000000000024	117	CDS	34050	34157	-	ID=formatted_Wolbachia_contigs___117	54.8056
GC_00000090	c_000000000025	118	CDS	383	661	-	ID=formatted_Wolbachia_contigs___118	396.67
GC_00000046	c_000000000025	119	CDS	898	1959	+	ID=formatted_Wolbachia_contigs___119;Name=PF02902.25;db_xref=Pfam:PF02902.25;product=Ulp1 protease family C-terminal catalytic domain	439.778	Ulp1 protease family C-terminal catalytic domain
GC_00000002	c_000000000025	120	CDS	3093	3965	+	ID=formatted_Wolbachia_contigs___120;Name=PF13612.12;db_xref=Pfam:PF13612.12;product=Transposase DDE domain	684.076	Transposase DDE domain
GC_00000031	c_000000000025	121	CDS	3962	4237	-	ID=formatted_Wolbachia_contigs___121	481.54
GC_00000097	c_000000000025	122	CDS	4402	5319	-	ID=formatted_Wolbachia_contigs___122;Name=PF01381.28;db_xref=Pfam:PF01381.28;product=Helix-turn-helix	466.097	Helix-turn-helix
GC_00000021	c_000000000025	123	CDS	5433	6326	+	ID=formatted_Wolbachia_contigs___123;Name=PF12784.13;db_xref=Pfam:PF12784.13;product=PD-(D/E)XK nuclease family transposase	541.977	PD-(D/E)XK nuclease family transposase
GC_00000094	c_000000000025	124	CDS	6688	7248	-	ID=formatted_Wolbachia_contigs___124	474.683
GC_00000012	c_000000000025	125	CDS	7394	7561	-	ID=formatted_Wolbachia_contigs___125	496.863
GC_00000010	c_000000000025	126	CDS	7561	8352	-	ID=formatted_Wolbachia_contigs___126;Name=PF04865.19;db_xref=Pfam:PF04865.19;product=Baseplate J-like protein	529.894	Baseplate J-like protein
GC_00000024	c_000000000025	127	CDS	8355	8690	-	ID=formatted_Wolbachia_contigs___127;Name=PF04965.19;db_xref=Pfam:PF04965.19;product=Baseplate wedge protein gp25	573.259	Baseplate wedge protein gp25
GC_00000017	c_000000000025	128	CDS	8687	8947	-	ID=formatted_Wolbachia_contigs___128;Name=PF05488.18;db_xref=Pfam:PF05488.18;product=PAAR motif	530.467	PAAR motif
GC_00000018	c_000000000025	129	CDS	8956	9420	-	ID=formatted_Wolbachia_contigs___129;Name=PF04717.18;db_xref=Pfam:PF04717.18;product=Type VI secretion system/phage-baseplate injector OB domain	514.656	Type VI secretion system/phage-baseplate injector OB domain
GC_00000014	c_000000000025	130	CDS	9407	9883	-	ID=formatted_Wolbachia_contigs___130	545.658
GC_00000011	c_000000000025	131	CDS	9880	10377	-	ID=formatted_Wolbachia_contigs___131;Name=PF06763.17;db_xref=Pfam:PF06763.17;product=Prophage minor tail protein Z (GPZ)	549.92	Prophage minor tail protein Z (GPZ)
GC_00000028	c_000000000025	132	CDS	10379	10684	-	ID=formatted_Wolbachia_contigs___132;Name=PF05354.17;db_xref=Pfam:PF05354.17;product=Phage Head-Tail Attachment protein	477.958	Phage Head-Tail Attachment protein
GC_00000004	c_000000000025	133	CDS	10782	11786	-	ID=formatted_Wolbachia_contigs___133;Name=PF03864.22;db_xref=Pfam:PF03864.22;product=Phage major capsid protein E	714.775	Phage major capsid protein E
GC_00000005	c_000000000026	134	CDS	1	1827	+	ID=formatted_Wolbachia_contigs___134;Name=PF05876.18;db_xref=Pfam:PF05876.18;product=Phage terminase large subunit gpA ATPase domain	1130.7	Phage terminase large subunit gpA ATPase domain
GC_00000019	c_000000000026	135	CDS	1817	2026	+	ID=formatted_Wolbachia_contigs___135	670.348
GC_00000003	c_000000000027	136	CDS	2	496	+	ID=formatted_Wolbachia_contigs___136;Name=PF01343.23;db_xref=Pfam:PF01343.23;product=Peptidase family S49	399.216	Peptidase family S49
GC_00000013	c_000000000027	137	CDS	642	1013	+	ID=formatted_Wolbachia_contigs___137;Name=PF02924.19;db_xref=Pfam:PF02924.19;product=Bacteriophage lambda head decoration protein D	465.629	Bacteriophage lambda head decoration protein D
GC_00000004	c_000000000027	138	CDS	1039	1122	+	ID=formatted_Wolbachia_contigs___138	180.357
GC_00000003	c_000000000028	139	CDS	2	514	+	ID=formatted_Wolbachia_contigs___139;Name=PF01343.23;db_xref=Pfam:PF01343.23;product=Peptidase family S49	266.493	Peptidase family S49
GC_00000013	c_000000000028	140	CDS	589	957	+	ID=formatted_Wolbachia_contigs___140;Name=PF02924.19;db_xref=Pfam:PF02924.19;product=Bacteriophage lambda head decoration protein D	268.799	Bacteriophage lambda head decoration protein D
GC_00000004	c_000000000028	141	CDS	1001	2005	+	ID=formatted_Wolbachia_contigs___141;Name=PF03864.22;db_xref=Pfam:PF03864.22;product=Phage major capsid protein E	413.958	Phage major capsid protein E
GC_00000092	c_000000000028	142	CDS	2005	2325	+	ID=formatted_Wolbachia_contigs___142;Name=PF05354.17;db_xref=Pfam:PF05354.17;product=Phage Head-Tail Attachment protein	244.794	Phage Head-Tail Attachment protein
GC_00000011	c_000000000028	143	CDS	2315	2812	+	ID=formatted_Wolbachia_contigs___143;Name=PF06763.17;db_xref=Pfam:PF06763.17;product=Prophage minor tail protein Z (GPZ)	265.769	Prophage minor tail protein Z (GPZ)
GC_00000014	c_000000000028	144	CDS	2809	3282	+	ID=formatted_Wolbachia_contigs___144	281.072
GC_00000018	c_000000000028	145	CDS	3269	3733	+	ID=formatted_Wolbachia_contigs___145;Name=PF04717.18;db_xref=Pfam:PF04717.18;product=Type VI secretion system/phage-baseplate injector OB domain	269.68	Type VI secretion system/phage-baseplate injector OB domain
GC_00000017	c_000000000028	146	CDS	3730	3984	+	ID=formatted_Wolbachia_contigs___146;Name=PF05488.18;db_xref=Pfam:PF05488.18;product=PAAR motif	261.333	PAAR motif
GC_00000024	c_000000000028	147	CDS	3987	4322	+	ID=formatted_Wolbachia_contigs___147;Name=PF04965.19;db_xref=Pfam:PF04965.19;product=Baseplate wedge protein gp25	226.786	Baseplate wedge protein gp25
GC_00000010	c_000000000028	148	CDS	4325	4621	+	ID=formatted_Wolbachia_contigs___148	242.135
GC_00000089	c_000000000029	151	CDS	7771	9108	+	ID=formatted_Wolbachia_contigs___151	76.2265
GC_00000091	c_000000000029	152	CDS	9116	11314	+	ID=formatted_Wolbachia_contigs___152;Name=PF08011.17;db_xref=Pfam:PF08011.17;product=PD-(D/E)XK nuclease superfamily	87.2588	PD-(D/E)XK nuclease superfamily
GC_00000093	c_000000000029	153	CDS	11964	13910	+	ID=formatted_Wolbachia_contigs___153;Name=PF12796.13;db_xref=Pfam:PF12796.13;product=Ankyrin repeats (3 copies)	93.5927	Ankyrin repeats (3 copies)
GC_00000020	c_000000000029	154	CDS	14377	14700	-	ID=formatted_Wolbachia_contigs___154	43.1512
GC_00000039	c_000000000031	156	CDS	208	2613	+	ID=formatted_Wolbachia_contigs___156;Name=PF20041.5;db_xref=Pfam:PF20041.5;product=Domain of unknown function (DUF6443)	27.4767	Domain of unknown function (DUF6443)
GC_00000012	c_000000000033	164	CDS	60	1004	+	ID=formatted_Wolbachia_contigs___164;Name=PF09684.15;db_xref=Pfam:PF09684.15;product=Phage tail protein (Tail_P2_I)	37.8307	Phage tail protein (Tail_P2_I)
GC_00000041	c_000000000034	165	CDS	3	917	+	ID=formatted_Wolbachia_contigs___165;Name=PF01381.28;db_xref=Pfam:PF01381.28;product=Helix-turn-helix	48.6798	Helix-turn-helix
GC_00000058	c_000000000034	166	CDS	1081	1749	+	ID=formatted_Wolbachia_contigs___166;Name=PF04002.20;db_xref=Pfam:PF04002.20;product=RadC-like JAB domain	55.2422	RadC-like JAB domain
GC_00000059	c_000000000034	167	CDS	2048	3280	+	ID=formatted_Wolbachia_contigs___167	52.0089
GC_00000041	c_000000000034	168	CDS	3344	4321	+	ID=formatted_Wolbachia_contigs___168;Name=PF01381.28;db_xref=Pfam:PF01381.28;product=Helix-turn-helix	56.4346	Helix-turn-helix
GC_00000023	c_000000000034	169	CDS	4388	5332	-	ID=formatted_Wolbachia_contigs___169;Name=PF01734.28;db_xref=Pfam:PF01734.28;product=Patatin-like phospholipase	46.2307	Patatin-like phospholipase
GC_00000039	c_000000000035	170	CDS	3	1580	-	ID=formatted_Wolbachia_contigs___170	39.571
GC_00000039	c_000000000035	171	CDS	1540	5331	-	ID=formatted_Wolbachia_contigs___171;Name=PF05593.20;db_xref=Pfam:PF05593.20;product=RHS Repeat	31.0475	RHS Repeat
GC_00000075	c_000000000037	174	CDS	3	1166	+	ID=formatted_Wolbachia_contigs___174;Name=PF00078.32;db_xref=Pfam:PF00078.32;product=Reverse transcriptase (RNA-dependent DNA polymerase)	23.4656	Reverse transcriptase (RNA-dependent DNA polymerase)

## Sheet: Isolate1 ∩ PipPel ∩ PipSLAB
GENE_CLUSTER	ID	GFF COLUMNS	2_y	3_y	4	6	8	ISOLATE COV / ISOLATE	PROTEIN
GC_00000129	c_000000000001	0	CDS	1	1911	-	ID=formatted_Wolbachia_contigs___0;Name=PF01653.23;db_xref=Pfam:PF01653.23;product=NAD-dependent DNA ligase adenylation domain	16.5965	NAD-dependent DNA ligase adenylation domain
GC_00000078	c_000000000006	12	CDS	113	874	+	ID=formatted_Wolbachia_contigs___12;Name=PF14706.11;db_xref=Pfam:PF14706.11;product=Transposase DNA-binding	41.9751	Transposase DNA-binding
GC_00000132	c_000000000017	49	CDS	2	1129	+	ID=formatted_Wolbachia_contigs___49;Name=PF00575.29;db_xref=Pfam:PF00575.29;product=S1 RNA binding domain	9.92287	S1 RNA binding domain
GC_00000131	c_000000000030	155	CDS	1	972	-	ID=formatted_Wolbachia_contigs___155;Name=PF01872.23;db_xref=Pfam:PF01872.23;product=RibD C-terminal domain	14.3755	RibD C-terminal domain
GC_00000106	c_000000000032	157	CDS	2	4150	+	ID=formatted_Wolbachia_contigs___157;Name=PF05088.18;db_xref=Pfam:PF05088.18;product=Bacterial NAD-glutamate dehydrogenase catalytic domain	29.5936	Bacterial NAD-glutamate dehydrogenase catalytic domain
GC_00000125	c_000000000032	158	CDS	4156	4446	+	ID=formatted_Wolbachia_contigs___158	27.9485
GC_00000126	c_000000000032	159	CDS	4418	5794	+	ID=formatted_Wolbachia_contigs___159;Name=PF00072.30;db_xref=Pfam:PF00072.30;product=Response regulator receiver domain	32.6129	Response regulator receiver domain
GC_00000120	c_000000000032	160	CDS	5817	6545	-	ID=formatted_Wolbachia_contigs___160;Name=PF02565.21;db_xref=Pfam:PF02565.21;product=Recombination protein O C terminal	32.0549	Recombination protein O C terminal
GC_00000124	c_000000000032	161	CDS	6742	7290	+	ID=formatted_Wolbachia_contigs___161	38.3133
GC_00000130	c_000000000032	163	CDS	7866	8045	+	ID=formatted_Wolbachia_contigs___163	7.11667
GC_00000121	c_000000000036	172	CDS	173	2734	+	ID=formatted_Wolbachia_contigs___172;Name=PF07724.20;db_xref=Pfam:PF07724.20;product=AAA domain (Cdc48 subfamily)	24.8638	AAA domain (Cdc48 subfamily)
GC_00000106	c_000000000036	173	CDS	2762	3220	+	ID=formatted_Wolbachia_contigs___173;Name=PF21075.3;db_xref=Pfam:PF21075.3;product=Glutamate dehydrogenase ACT1 domain	29.0784	Glutamate dehydrogenase ACT1 domain

## Sheet: Isolate1 ∩ PipPel
GENE_CLUSTER	ID	GFF COLUMNS	2_y	3_y	4	6	8	ISOLATE COV / ISOLATE	PROTEIN
GC_00000110	162	c_000000000032	CDS	7338	7667	+	ID=formatted_Wolbachia_contigs___162;Name=PF01797.21;db_xref=Pfam:PF01797.21;product=Transposase IS200 like	16.1333	Transposase IS200 like

## Sheet: Isolate1 ∩ PipSLAB
GENE_CLUSTER	ID	GFF COLUMNS	2_y	3_y	4	6	8	ISOLATE COV / ISOLATE	PROTEIN
GC_00000510	46	c_000000000015	CDS	313	1062	+	ID=formatted_Wolbachia_contigs___46	31.86
GC_00000152	48	c_000000000016	CDS	2	2947	-	ID=formatted_Wolbachia_contigs___48	85.7654
GC_00000283	60	c_000000000020	CDS	3190	3495	+	ID=formatted_Wolbachia_contigs___60	46.9379
GC_00000153	73	c_000000000022	CDS	2	643	+	ID=formatted_Wolbachia_contigs___73;Name=PF15658.11;db_xref=Pfam:PF15658.11;product=Latrotoxin C-terminal domain	42.7757	Latrotoxin C-terminal domain
GC_00001080	86	c_000000000024	CDS	6279	6689	-	ID=formatted_Wolbachia_contigs___86;Name=PF13586.12;db_xref=Pfam:PF13586.12;product=Transposase DDE domain	157.81	Transposase DDE domain
GC_00000191	87	c_000000000024	CDS	6731	7111	-	ID=formatted_Wolbachia_contigs___87;Name=PF13340.11;db_xref=Pfam:PF13340.11;product=Putative transposase of IS4/5 family (DUF4096)	140.95	Putative transposase of IS4/5 family (DUF4096)
GC_00001045	149	c_000000000029	CDS	153	1133	+	ID=formatted_Wolbachia_contigs___149;Name=PF13683.12;db_xref=Pfam:PF13683.12;product=Integrase core domain	36.6126	Integrase core domain
GC_00000711	150	c_000000000029	CDS	1201	6801	-	ID=formatted_Wolbachia_contigs___150;Name=PF02338.25;db_xref=Pfam:PF02338.25;product=OTU-like cysteine protease	35.4576	OTU-like cysteine protease

## Sheet: PipPel ∩ PipSLAB ∩ WO
GENE_CLUSTER	GFF COLUMNS	2_y	3_y	4	6	8	PROTEIN	ISOLATE COV / PipSLAB	Annotation in PipPel
GC_00000074	SLAB002_Cxq_ov_000000008538	CDS	155	703	-	ID=SLAB002_Cxq_ov_Wolbachia_contigs___162		11.3552
GC_00000115	SLAB002_Cxq_ov_000000038567	CDS	1793	2812	-	ID=SLAB002_Cxq_ov_Wolbachia_contigs___279;Name=PF13310.11;db_xref=Pfam:PF13310.11;product=Virulence protein RhuM family	Virulence protein RhuM family	4.70588
GC_00000116	SLAB002_Cxq_ov_000000037130	CDS	6492	6617	-	ID=SLAB002_Cxq_ov_Wolbachia_contigs___531		416.294	Between WP1292 (cifB trunc) and WP1293
GC_00000122	SLAB002_Cxq_ov_000000007112	CDS	797	4333	+	ID=SLAB002_Cxq_ov_Wolbachia_contigs___586;Name=PF00176.29;db_xref=Pfam:PF00176.29;product=SNF2-related domain	SNF2-related domain	4.86401
GC_00000072	SLAB002_Cxq_ov_000000007112	CDS	7805	8299	+	ID=SLAB002_Cxq_ov_Wolbachia_contigs___588;Name=PF04542.20;db_xref=Pfam:PF04542.20;product=Sigma-70 region 2	Sigma-70 region 2	6.80202
GC_00000127	SLAB002_Cxq_ov_000000014716	CDS	225	425	+	ID=SLAB002_Cxq_ov_Wolbachia_contigs___875		13.2687
GC_00000119	SLAB002_Cxq_ov_000000014716	CDS	409	690	+	ID=SLAB002_Cxq_ov_Wolbachia_contigs___876;Name=PF05016.21;db_xref=Pfam:PF05016.21;product=ParE toxin of type II toxin-antitoxin system parDE	ParE toxin of type II toxin-antitoxin system parDE	10.5709
GC_00000128	SLAB002_Cxq_ov_000000010763	CDS	2831	4075	-	ID=SLAB002_Cxq_ov_Wolbachia_contigs___916;Name=PF07690.21;db_xref=Pfam:PF07690.21;product=Major Facilitator Superfamily	Major Facilitator Superfamily	12.8691
GC_00000117	SLAB002_Cxq_ov_000000010763	CDS	4088	4498	-	ID=SLAB002_Cxq_ov_Wolbachia_contigs___917;Name=PF00583.31;db_xref=Pfam:PF00583.31;product=Acetyltransferase (GNAT) family	Acetyltransferase (GNAT) family	14
GC_00000123	SLAB002_Cxq_ov_000000010763	CDS	5291	5554	+	ID=SLAB002_Cxq_ov_Wolbachia_contigs___918		39.0833	WP0463
GC_00000114	SLAB002_Cxq_ov_000000038758	CDS	179	3865	+	ID=SLAB002_Cxq_ov_Wolbachia_contigs___962;Name=PF13637.12;db_xref=Pfam:PF13637.12;product=Ankyrin repeats (many copies)	Ankyrin repeats (many copies)	14.9894

## Sheet: PipPel ∩ WO
GENE_CLUSTER	GFF COLUMNS	2_y	3_y	4	6	8	ID PipPel	PROTEIN	ISOLATE COV / PipPel
GC_00000563	wPipPel_000000000001	CDS	264507	265358	-	ID=wPipPel___265;Name=PF02498.22;db_xref=Pfam:PF02498.22;product=BRO family N-terminal domain	WP0260	BRO family N-terminal domain	0.962441
GC_00001086	wPipPel_000000000001	CDS	267301	268695	-	ID=wPipPel___267;Name=PF03050.19;db_xref=Pfam:PF03050.19;product=Transposase IS66 family	WP0262	Transposase IS66 family	3.77778
GC_00000085	wPipPel_000000000001	CDS	270950	271456	-	ID=wPipPel___269	WP0263-WP0264		0
GC_00000522	wPipPel_000000000001	CDS	298496	306742	-	ID=wPipPel___298;Name=PF12796.12;db_xref=Pfam:PF12796.12;product=Ankyrin repeats (3 copies)	WP0292	Ankyrin repeats (3 copies)	52.4086
GC_00000085	wPipPel_000000000001	CDS	344455	344961	-	ID=wPipPel___327	WP0320		0.244576
GC_00001073	wPipPel_000000000001	CDS	368360	368905	-	ID=wPipPel___354	WP0348		0
GC_00000817	wPipPel_000000000001	CDS	368937	369071	-	ID=wPipPel___355	WP0349		0
GC_00000831	wPipPel_000000000001	CDS	369386	371752	+	ID=wPipPel___356;Name=PF04851.20;db_xref=Pfam:PF04851.20;product=Type III restriction enzyme res subunit	WP0350	Type III restriction enzyme res subunit	0.0912548
GC_00000534	wPipPel_000000000001	CDS	371924	373738	+	ID=wPipPel___357	WP0351		0
GC_00000678	wPipPel_000000000001	CDS	452262	452657	-	ID=wPipPel___425;Name=PF00903.30;db_xref=Pfam:PF00903.30;product=Glyoxalase/Bleomycin resistance protein/Dioxygenase superfamily	WP0423	Glyoxalase/Bleomycin resistance protein/Dioxygenase superfamily	0
GC_00000699	wPipPel_000000000001	CDS	467103	467603	+	ID=wPipPel___436	WP0434		0
GC_00000742	wPipPel_000000000001	CDS	485656	485988	-	ID=wPipPel___459	WP0456		0.252252
GC_00000151	wPipPel_000000000001	CDS	1413213	1413731	+	ID=wPipPel___1350;Name=PF13637.11;db_xref=Pfam:PF13637.11;product=Ankyrin repeats (many copies)	WP1337	Ankyrin repeats (many copies)	3.88825
